# Supplementary material for: High-density SNP association study and copy number variation analysis of the AUTS1 and AUTS5 loci implicate the IMMP2L–DOCK4 gene region in autism susceptibility
Source: PubMed Central journal article supplement — Mol Psychiatry. 2009 Apr 28;15(9):954–68. doi: 10.1038/mp.2009.34 (PMC2934739; doi:10.1038/mp.2009.34), 2009-04-28
Supplement: mp200934x1.pdf [file mp200934x1.pdf]

**SUPPLEMENTARY INFORMATION FOR:**

**High-density SNP association study and copy number variation analysis of the *AUTS1* and *AUTS5* loci implicates the *IMMP2L-DOCK4* gene region in autism susceptibility.**

Maestrini E\*, Pagnamenta AT\*, Lamb JA\*, Bacchelli E, Sykes NH, Sousa I, Toma C, Barnby G, Butler H, Winchester L, Scerri TS, Minopoli F, Reichert J, Cai G, Buxbaum JD, Korvatska O, Schellenberg GD, Dawson G, de Bildt A, Minderaa RB, Mulder EJ, Morris AP, Bailey AJ<sup>§</sup>, Monaco AP<sup>§</sup>, IMGSAC

\* The first three authors contributed equally to this work

<sup>§</sup> to whom correspondence should be addressed.

E-mail: [anthony.monaco@well.ox.ac.uk](mailto:anthony.monaco@well.ox.ac.uk); [anthony.bailey@psych.ox.ac.uk](mailto:anthony.bailey@psych.ox.ac.uk)

**This file includes:**

- Members of the International Molecular Genetic Study of Autism Consortium (IMGSAC)
- Supplementary Methods
- Supplementary References
- Figures S1 to S4
- Tables S1 and S2

## **IMGSAC members:**

Richard Holt<sup>1</sup>, Kirsty Wing<sup>1</sup>, Michael L Rutter<sup>2</sup>, Jeremy R Parr<sup>3</sup>, Simon Wallace<sup>3</sup>, Kathy White<sup>3</sup>, Marc Coutanche<sup>3</sup>, Suzanne Foley<sup>3</sup>, Katy Renshaw<sup>3</sup>, Kerstin Wittmeyer<sup>3</sup>, Magdalena Laskawiec<sup>3</sup>, Patrick F Bolton<sup>4</sup>, Gillian Baird<sup>5</sup>, Vicky Slonims<sup>5</sup>, Zoe Docherty<sup>6</sup>, Stephen Abbs<sup>6</sup>, Caroline Ogilvie<sup>6</sup>, Pamela Warburton<sup>6</sup>, Andrew Pickles<sup>7</sup>, Jonathan Green<sup>8</sup>, Catherine Aldred<sup>8</sup>, Julie-Anne Wilkinson<sup>8</sup>, Ann Le Couteur<sup>9</sup>, Tom Berney<sup>9</sup>, Helen McConachie<sup>9</sup>, Emma Weisblatt<sup>10</sup>, Lennart Pedersen<sup>11</sup>, Demetrious Haracopos<sup>11</sup>, Torben Isager<sup>12</sup>, Birgitte Viskum<sup>12</sup>, Ester Ulsted Sorensen<sup>12</sup>, Karen Brondum-Nielsen<sup>13</sup>, Bernadette Rogé<sup>14</sup>, Jeanne Fremolle-Kruck<sup>14</sup>, Carine Mantoulan<sup>14</sup>, Inci Unsaldi-Cordier<sup>14</sup>, Fritz Poustka<sup>15</sup>, Gabriele Schmoetzer<sup>15</sup>, Eftichia Duketis<sup>15</sup>, Sven Boelte<sup>15</sup>, Sabine Feineis Matthews<sup>15</sup>, Sabine Schlitt<sup>15</sup>, Annemarie Poustka<sup>16</sup>, Sabine M Klauck<sup>16</sup>, Bärbel Felder<sup>16</sup>, Geeta Pakalapati<sup>16</sup>, John Tsiantis<sup>17</sup>, Katerina Papanikolaou<sup>17</sup>, Elena Giouroukou<sup>17</sup>, Elena Paliokosta<sup>17</sup>, Simona Carone<sup>18</sup>, Francesca Blasi<sup>18</sup>, Fiorella Minopoli<sup>18</sup>, Agatino Battaglia<sup>19</sup>, Tiziana Filippi<sup>19</sup>, Raffaella Tancredi<sup>19</sup>, Barbara Parrini<sup>19</sup>, Roberta Iglizzi<sup>19</sup>, Herman Van Engeland<sup>20</sup>, Maretha de Jonge<sup>20</sup>, Chantal Kemner<sup>20</sup>, Marjolijn Langemeijer<sup>20</sup>, Channa Hijmans<sup>20</sup>, Frederieke Koop<sup>20</sup>, Wouter Staal<sup>20</sup>, Catherine Lord<sup>21</sup>, Edwin H Cook<sup>22</sup>, Stephen J Guter<sup>22</sup>, Jeff Salt<sup>22</sup>, Bennett L Leventhal<sup>22</sup>, Fred Volkmar<sup>23</sup>, Eric Fombonne<sup>24</sup>.

<sup>1</sup>Wellcome Trust Centre for Human Genetics, University of Oxford, Oxford, UK;

<sup>2</sup>Institute of Psychiatry, London, UK; <sup>3</sup>University Department of Psychiatry, Warneford Hospital, Oxford, UK; <sup>4</sup>Institute of Psychiatry, Department of Child and Adolescent Psychiatry, London, UK; <sup>5</sup>Guy's Hospital, Newcomen Centre, London, UK; <sup>6</sup>Regional Genetics Centre, Guy's Hospital, London, UK; <sup>7</sup>University of Manchester School of Epidemiology and Health Science, Manchester, UK;

<sup>8</sup>Academic Department of Child Psychiatry, Booth Hall Children's Hospital, Manchester, UK; <sup>9</sup>University of Newcastle, Child and Adolescent Mental Health, Sir James Spence Institute, Newcastle upon Tyne, UK; <sup>10</sup>University of Cambridge Clinical School, Cambridge, UK; <sup>11</sup>Center for Autisme, Herlev, Denmark; <sup>12</sup>Børne- og ungdomspsykiatrisk center Glostrup, Denmark; <sup>13</sup>John F Kennedy Instituttet, Glostrup, Denmark; <sup>14</sup>Université de Toulouse Le Mirail, Centre d'Etudes et de Recherches en Psychopathologie (CERPP), Toulouse, France; <sup>15</sup>J W Goethe Universitaet Frankfurt, Klinik für Psychiatrie und Psychotherapie des Kindes- und Jugendalters, Frankfurt, Germany; <sup>16</sup>Deutsches Krebsforschungszentrum (DKFZ), Department of Molecular Genome Analysis, Heidelberg, Germany; <sup>17</sup>University Department of Child Psychiatry, Agia Sophia Children's Hospital, Athens, Greece; <sup>18</sup>Department of Biology, University of Bologna, Bologna, Italy; <sup>19</sup>Stella Maris Clinical Research Institute for Child and Adolescent Neuropsychiatry, Calambrone (Pisa), Italy; <sup>20</sup>Department of Child and Adolescent Psychiatry, University Medical Center, Utrecht, the Netherlands; <sup>21</sup>University of Michigan Autism and Communicative Disorders Center (UMACC), Ann Arbor, MI, USA; <sup>22</sup>University of Illinois at Chicago, Institute for Juvenile Research, Chicago, IL, USA; <sup>23</sup>Yale University Child Study Centre, New Haven, CT, USA; <sup>24</sup>McGill University Division of Psychiatry, Montreal Children's Hospital, Montreal, Quebec, Canada.

## **SUPPLEMENTARY METHODS**

### **DNA samples**

Genomic DNA was extracted from whole blood or EBV transformed lymphoblastoid cell lines. In a minority of cases DNA was extracted from buccal swabs. For 14% of DNA samples having low concentration (< 100ng/μl) whole genome amplification (WGA) was carried out using the GenomiPhi (GE Health Care) or Qiagen kit (REPLI-G). All samples were quantified using PicoGreen and subsequently normalised to 100 ng/μl.

### **Genotyping Quality Control**

20 duplicate SNPs (10 for each chromosome) were genotyped in stages 1 and 2 to test for experiment-wise concordance. 10 chromosome X SNPs were also genotyped to estimate levels of mistyping. Two HapMap CEPH samples were added to each 96-well sample plate for quality control validation of inter-plate concordance and quality assurance. All SNPs were examined for genotyping quality. Pedstats<sup>1</sup> was used to calculate MAF, genotyping call rate and deviation from Hardy-Weinberg equilibrium. We excluded all SNPs with less than 90% genotyping rate, SNPs deviating from Hardy-Weinberg Equilibrium ( $P < 0.001$ ) in the control population, and SNPs with more than 1 Mendelian error. DNA samples with less than 90% genotyping rate were excluded. All SNP cluster plots were visually inspected using the BeadStudio software, and SNPs with bad clustering or more than three clusters were excluded. SNPs with ambiguous clusters were sequenced using the dideoxy chain termination method in order to resolve Mendelian errors. In this way a number of SNPs were “rescued”. Most SNPs with multiple clustering turned out to have a secondary SNP

nearby, in the allele-specific or locus-specific primer sequences; a few SNPs were triallelic.

In addition, genotyping success rates were evaluated in cases versus controls and in WGA versus non-WGA samples. No significant differences in missingness were detected.

## **Statistical Analysis**

### ***Power Calculations***

Preliminary power calculations were performed in order to determine the optimum study design. Genotypes were simulated using an autism prevalence of 0.17% and allelic odds ratios (OR) ranging from 1.1 to 1.6, and a range of risk allele frequencies from 0.05 to 0.5.

Two alternative strategies were compared, given fixed genotyping resources totalling 1.8 million genotypes. *i*) Strategy A: type 200 controls and 100 sib-pair families (both affected sibs), chosen at random, at 3000 SNPs. *ii*) Strategy B: type 200 controls and 133 families (one affected sibs), selected for IBD, at 3000 SNPs. In 1000 replicates, strategy B outperformed strategy A, for any combination of OR and risk allele frequencies. For instance, in the case-control analysis the proportion of 1000 replicates yielding significant evidence of association at 5% experimentwise significance level (assuming Bonferroni correction for 3000 tests) at a minor allele frequency of 0.2 and OR of 1.6 was 0.661 for IBD sharing families, but only 0.415 for randomly selected families. In the corresponding family-based calculations, the power was also increased for this alternative strategy; 0.225 compared to 0.099. Power calculations for the IMGSAC-R and ND replication data sets were carried out using the Genetic Power Calculator for discrete trait TDT (GPC)<sup>2</sup>. Parameters used

for the GPC were 0.17% for the disease prevalence, a perfect LD between tested marker and disease allele, an additive model and a type 1 error rate of 0.0018 (applying the Bonferroni correction for 28 replication SNPs tested at each locus).

Given that our significant SNPs in the primary sample showed an allelic OR of less than 2, and risk allele frequencies between 0.1 and 0.4, we performed power calculations over a range of risk allele frequencies (0.1-0.4) and of OR (1.2-2), allowing for the winners curse effect. This analysis showed that our combined replication sample (IMGSAC-R and ND collections) including 295 complete trios should give us enough power ( $\geq 77\%$ ) to detect a risk allele with frequency  $> 0.2$  and genotype relative risk (GRR)  $\geq 1.7$ , or a risk allele with frequency  $> 0.1$  and GRR  $\geq 2$ .

While the Mount Sinai sample should provide sufficient power for replication due to its larger sample size (358 families), the 62 trios from U. Washington would allow only common variants with a large effect (GRR  $> 2$ ) to be detected, although this might be an underestimation since these families were selected for increased IBD sharing on chromosome 7 from a larger collection of 222 families.

### ***Comparison of LD levels between autism and HapMap CEU samples***

To comprehensively evaluate how well the LD structure in the HapMap CEU data models the structure found in the IMGSAC autism sample, the level of LD ( $r^2$ ) between all tag SNP pairs within 500kb of each other on chromosome 2 was calculated using HaploView and compared between the two populations. LD levels were significantly correlated between the two populations ( $r^2 = 0.95$ ), indicating that the LD structure in the HapMap CEU data can be readily applied to our autism sample, although there may be a minor loss in capturing the variability.

### ***GENEBPM software***

The GENE<sup>BPM</sup><sup>3,4</sup> algorithm was originally developed to assess haplotype association with disease in population-based studies within small candidate regions or blocks of strong LD. Maximum-likelihood SNP haplotype reconstructions are obtained via implementation of the expectation-maximisation (E-M) algorithm. A Bayesian partition model is used to describe the correlation between SNP haplotypes and causal variants at unobserved functional polymorphisms. Under this model, haplotypes are clustered according to their similarity in terms of marker-SNP allele matched, which is used as a proxy for shared ancestry. Haplotypes within the same cluster are assigned the same probability of carrying a causal variant. In this way, loss of power due to the presence of large numbers of haplotypes, particularly those that are rare, within a block can be avoided. Disease status is modelled in a logistic regression framework, parameterised in terms of additive and dominance effects of the causal variant(s), and here incorporating a main effect of gender. Evidence of association is assessed by means of a Bayes' factor, calculated by comparing the marginal likelihoods of a model of haplotype association (i.e. more than one cluster of haplotypes) with that of no haplotype association (i.e. one cluster of haplotypes).

The methodology has also been extended to allow for family-based association studies for samples of trios. The SNP haplotypes in founders are reconstructed using an E-M algorithm, conditioning on the genotype data available in their child. Pseudo-control individuals are matched to each affected child, constructed from the possible haplotype pairs not transmitted to the affected child. Disease status is then modelled in a conditional logistic regression framework, parameterized in terms of additive and dominance effects of the causal variants, as before, but also in terms of parent of

origin effects, to allow for differential transmission of causal variants from the mother and father.

GENEBPM analyses were also performed using a sliding window of 5 SNPs across each chromosomal region. For comparison with frequentist single-SNP analyses, the GENEBPM algorithm has also been applied to each SNP in turn (i.e. single SNP “haplotypes”).

### **Copy number variation**

#### ***QuantiSNP analysis***

After exclusion of whole genome amplified samples from the BeadStudio project (approximately 14% of samples), final reports were generated containing B-allele frequency, log R ratio data and build 36 genome coordinates. Data from both GoldenGate arrays were combined for each region, no-calls were deleted and these files were run on QuantiSNP v1.<sup>5</sup> using the following settings: L=1M, array type=100k, EMiters=25, maxcopy=4, GC correction=ON. The QuantiSNP software is not designed specifically for the GoldenGate platform and indeed, the number of CNVs detected suggested a high level of false positives. Therefore DNA samples resulting in a number of CNV  $\geq$  95<sup>th</sup> percentile ( $\geq$ 5 CNVs per sample) were removed. CNVs were then sorted by log Bayes factor and any scoring less than 10 were removed from further analysis.

#### ***CNV validation and screening***

Screening of the deletion identified in *UPP2* was carried out by multiplex PCR with two primer pairs: one inside the deleted region giving a fragment of 236 bp in the wild type allele, and the other across the deleted region giving rise to a fragment of 323 bp

in the deleted allele (Fig S2B).

Validation of CNVs in the *IMMP2L-DOCK4* region was performed by Quantitative Multiplex PCR of Short fluorescent Fragments (QMPSF)<sup>6</sup>. Short fragments in exons 2, 3, and 6 of the *IMMP2L*, exon 4 of *LRRN3* and exon 52 of *DOCK4* were simultaneously PCR amplified, in a single tube, using dye-labelled primers. An additional fragment, corresponding to exon 7 of the *RNF20* gene located on chromosome 9q, was co-amplified as a control. Sequences and PCR conditions of all primer pairs are available on request from the authors. One  $\mu$ l of the PCR product was resuspended in a mix containing 8.8  $\mu$ l of deionised formamide, 0.2  $\mu$ l of GeneScan™ 600 LIZ Size Standard (Applied Biosystems). PCR products were run on an ABI prism 3730 sequencer and the data analysed using GENEMAPPER™ software (Applied Biosystems).

The copy-number was calculated using the following formula:

$(A_{\text{sample}}/A_{\text{average}}) \times (A_{\text{RNF average}}/A_{\text{RNF sample}})$ , where “A sample” is the peak area of each locus-specific probe, while “A average” is the average of peak areas of all samples in the same run for the same probe. A reduction greater than 0.4 of the peak area indicates a hemizygous deletion, whereas a duplication results in an increase of at least 1.4. Each positive result was confirmed in a second independent QMPSF assay.

The segregation of the *IMMP2L-DOCK4* deletion in pedigree 15-0084 was also consistent with the inheritance pattern of two SNPs (rs1978247 and rs12672270).

Quantitative PCR of *DOCK4* exons 37, 31, 14 and 7 was carried out in blood-derived DNA from subject 15-0084-001 (father), 15-0084-002 (mother) and 15-0084-003 (affected son). The following primers were designed for various *DOCK4* exons using Primer3. Exon7, TGGGTCCTGTTATTCCTTCAG and



TTCATCTGGACAAAGAGGTGGT; Exon14, AACCTGTGTGTTCTTCCCTTTG and GACCACCTGGGACTGTTGTTAT; Exon31, CTCACCTTAGGAGAGCACAAGC and TCTGCTCCCAGTCCATCATATC; Exon37, ATGACGAGCTACTGGAATGGTC and CCTCTGTCAAAGTTCTGGATGA. The housekeeping gene *GAPDH* was also amplified as a reference gene, using primers TACTAGCGGTTTTACGGGCG and TCGAACAGGAGGAGCAGAGAGCGA. Annealing temperature was 59°C for all PCRs, and efficiencies were calculated using a dilution series of 100ng, 50ng, 25ng, 12.5ng and 6.25ng and 3.125ng of DNA template. All samples were run in triplicate on the iQ5 Real-Time PCR Detection System (BioRad) with the cycle threshold (Ct) means used for calculations. We used the iQ SYBR Green Supermix, and carried out melting curve analysis of PCR products to ensure specific amplification. Ct outliers were removed if the SD of the triplicates was >0.5 cycles. Relative copy number was calculated taking PCR efficiency into account, and using the father (15-0084-001) as a non-deleted reference sample, as described<sup>7</sup>. The experiment was carried out twice and identical results were obtained.

### **Mutation screening**

The entire coding sequence and putative regulatory regions of the *NOSTRIN* and *ZNF533* genes were sequenced in 31 autistic individuals, including all individuals carrying 2 copies of most significant risk alleles; the coding sequence of *UPP2* was sequenced in 47 subjects, including 12 probands carrying the deletion of exons 6 and 7; the *IMMP2L* and *LRRN3* genes were sequenced in eight individuals with autism, including five homozygous for the most significant risk haplotype. No novel coding variants were identified, except one silent change in exon 4 of *UPP2* gene in only one

individual.

Sequencing primers and conditions are available on request.

#### **SUPPLEMENTARY REFERENCES**

1. Wigginton JE, Abecasis GR. PEDSTATS: descriptive statistics, graphics and quality assessment for gene mapping data. *Bioinformatics* 2005; **21**: 3445-7.
2. Purcell S, Cherny SS, Sham PC. Genetic Power Calculator: design of linkage and association genetic mapping studies of complex traits. *Bioinformatics*. 2003; **19**: 149-50.
3. Morris AP. Direct analysis of unphased SNP genotype data in population-based association studies via Bayesian partition modelling of haplotypes. *Genet Epidemiol* 2005; **29**: 91-107.
4. Morris AP. A flexible Bayesian framework for modeling haplotype association with disease, allowing for dominance effects of the underlying causative variants. *Am J Hum Genet* 2006; **79**: 679-94.
5. Colella S, Yau C, Taylor JM, Mirza G, Butler H, Clouston P *et al.* QuantiSNP: an Objective Bayes Hidden-Markov Model to detect and accurately map copy number variation using SNP genotyping data. *Nucleic Acids Res* 2007; **35**: 2013-25.
6. Saugier-Veber P, Goldenberg A, Drouin-Garraud V, de La Rochebrochard C, Layet V, Drouot N *et al.* Simple detection of genomic microdeletions and microduplications using QMPSF in patients with idiopathic mental retardation. *Eur J Hum Genet* 2006; **14**: 1009-17.
7. Pfaffl MW. A new mathematical model for relative quantification in real-time RT-PCR. *Nucleic Acids Res* 2001; **29**: e45.

### **Supplementary Figure Legends**

#### **Figure S1: Graphical representation of chromosome 2 and 7 GENEPM analysis**

$\log_{10}$  Bayes' Factor values are plotted against the chromosome position.

#### **Figure S2: deletion in *UPP2***

A: Position of the *UPP2* deletion on chromosome 2, shown on the UCSC browser; B: multiplex PCR assay showing 3 samples heterozygous for the deleted allele (lanes 4, 5 and 8)

#### **Figure S3: SNP data showing *IMMP2L / DOCK4* duplication in subject 13-3023-**

**001.** GoldenGate SNP data for the proband is shown on both arrays separately. Data for SNPs showing B-allele frequency consistent with AAB or ABB genotypes are boxed. SNPs within the boundaries of the region detected are highlighted in red.

Screenshots are from the Illumina Genome Viewer in BeadStudio.

#### **Figure S4: Quantitative PCR of *DOCK4* exons in pedigree 15-0084.**

Quantitative PCR of blood-derived DNA from family 15-0084 indicates that the distal *DOCK4* deletion breakpoint is between exon 31 and exon 14. A relative copy number of 0.7 was used as the threshold for determining deleted regions. 15-0084-001 was used as the non-deleted reference sample.

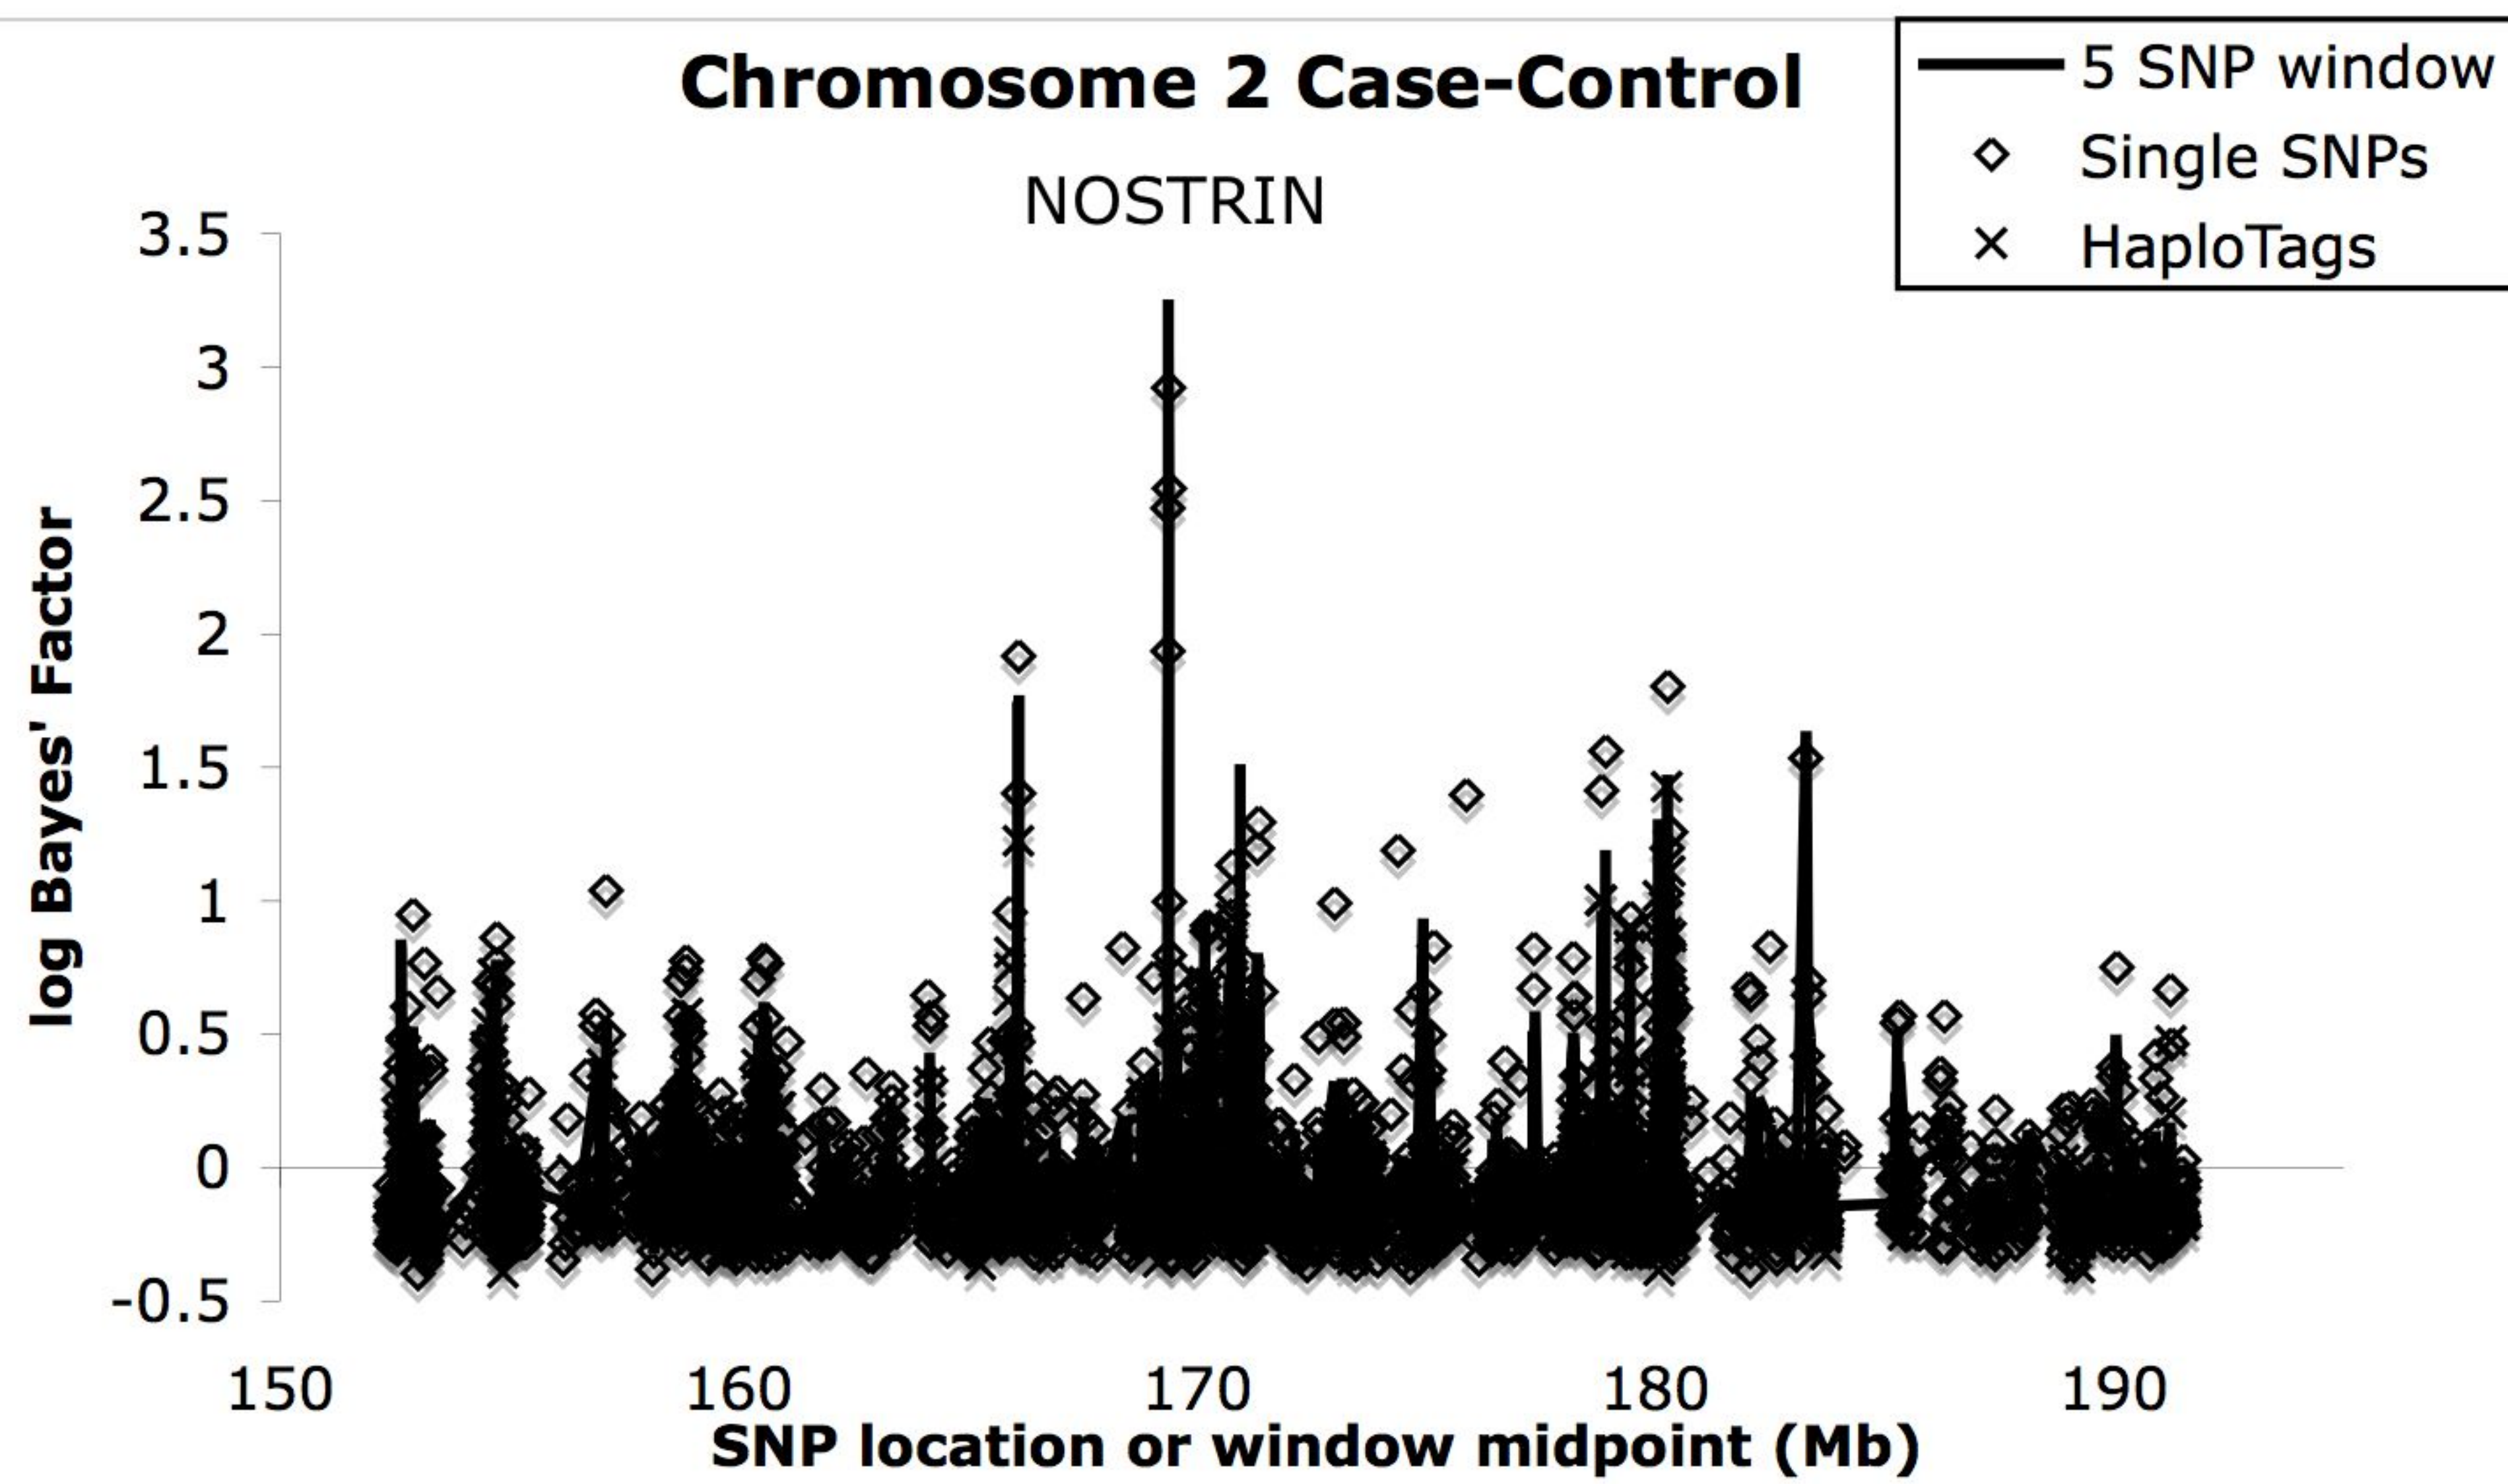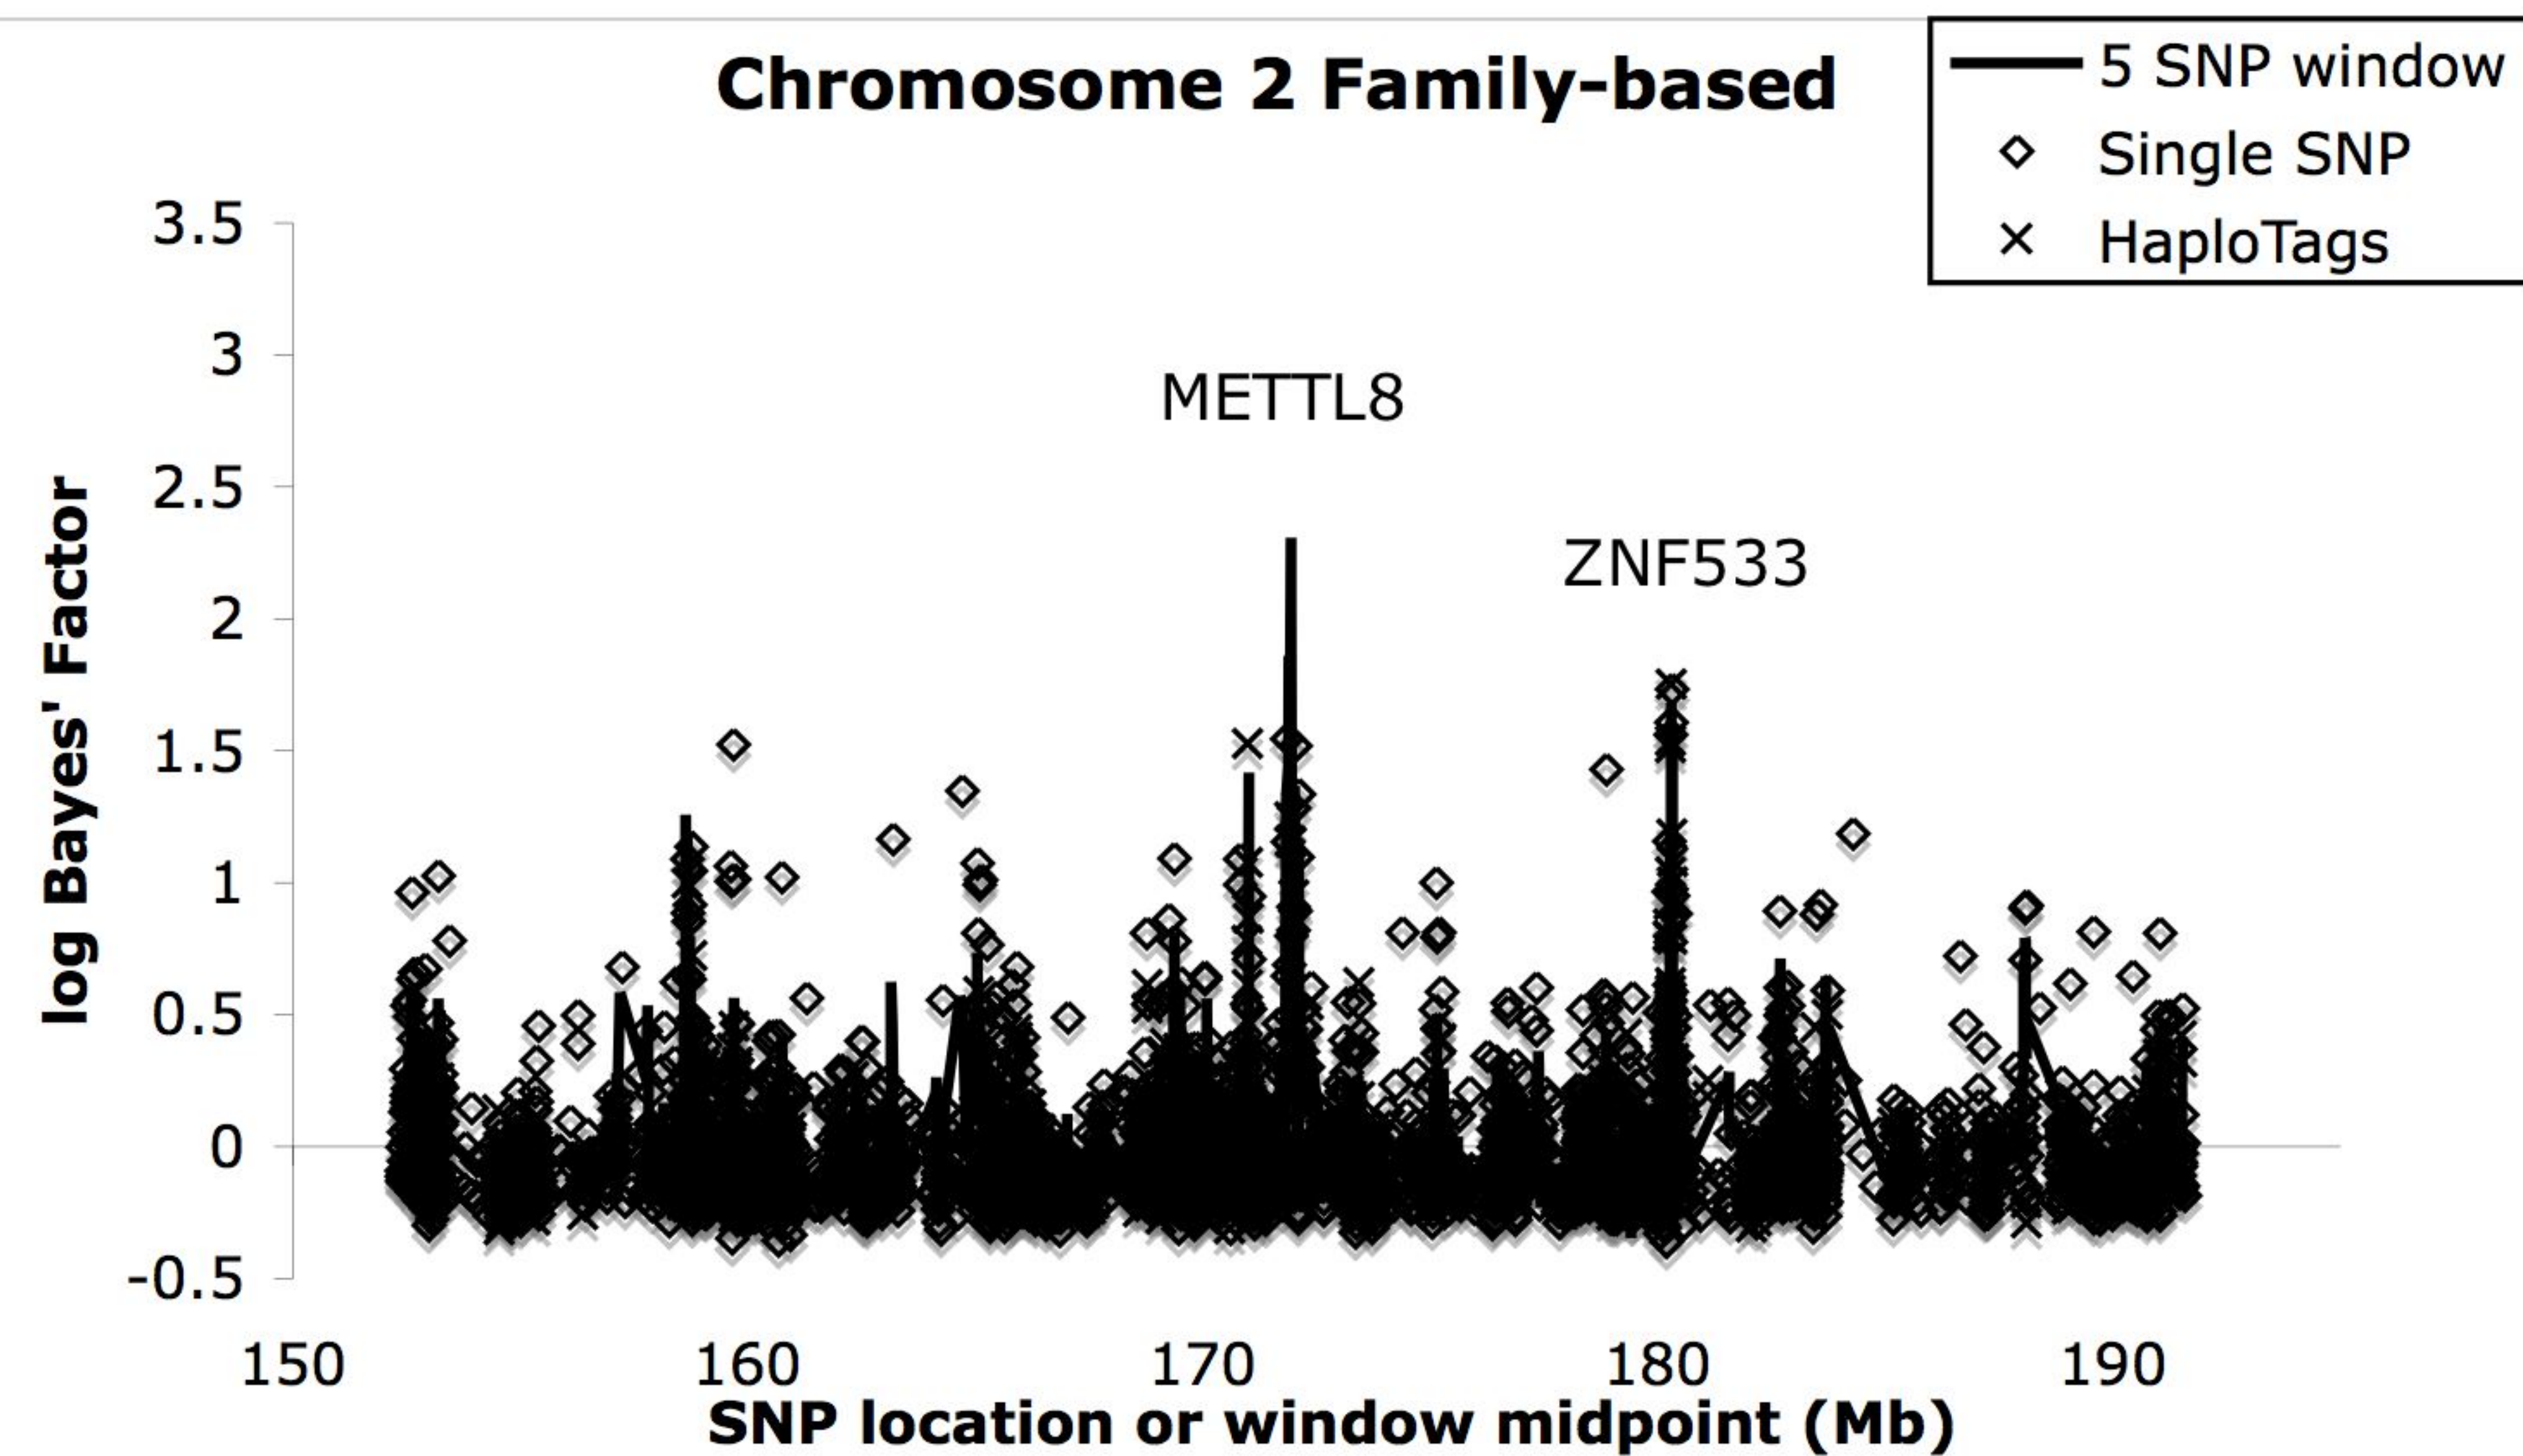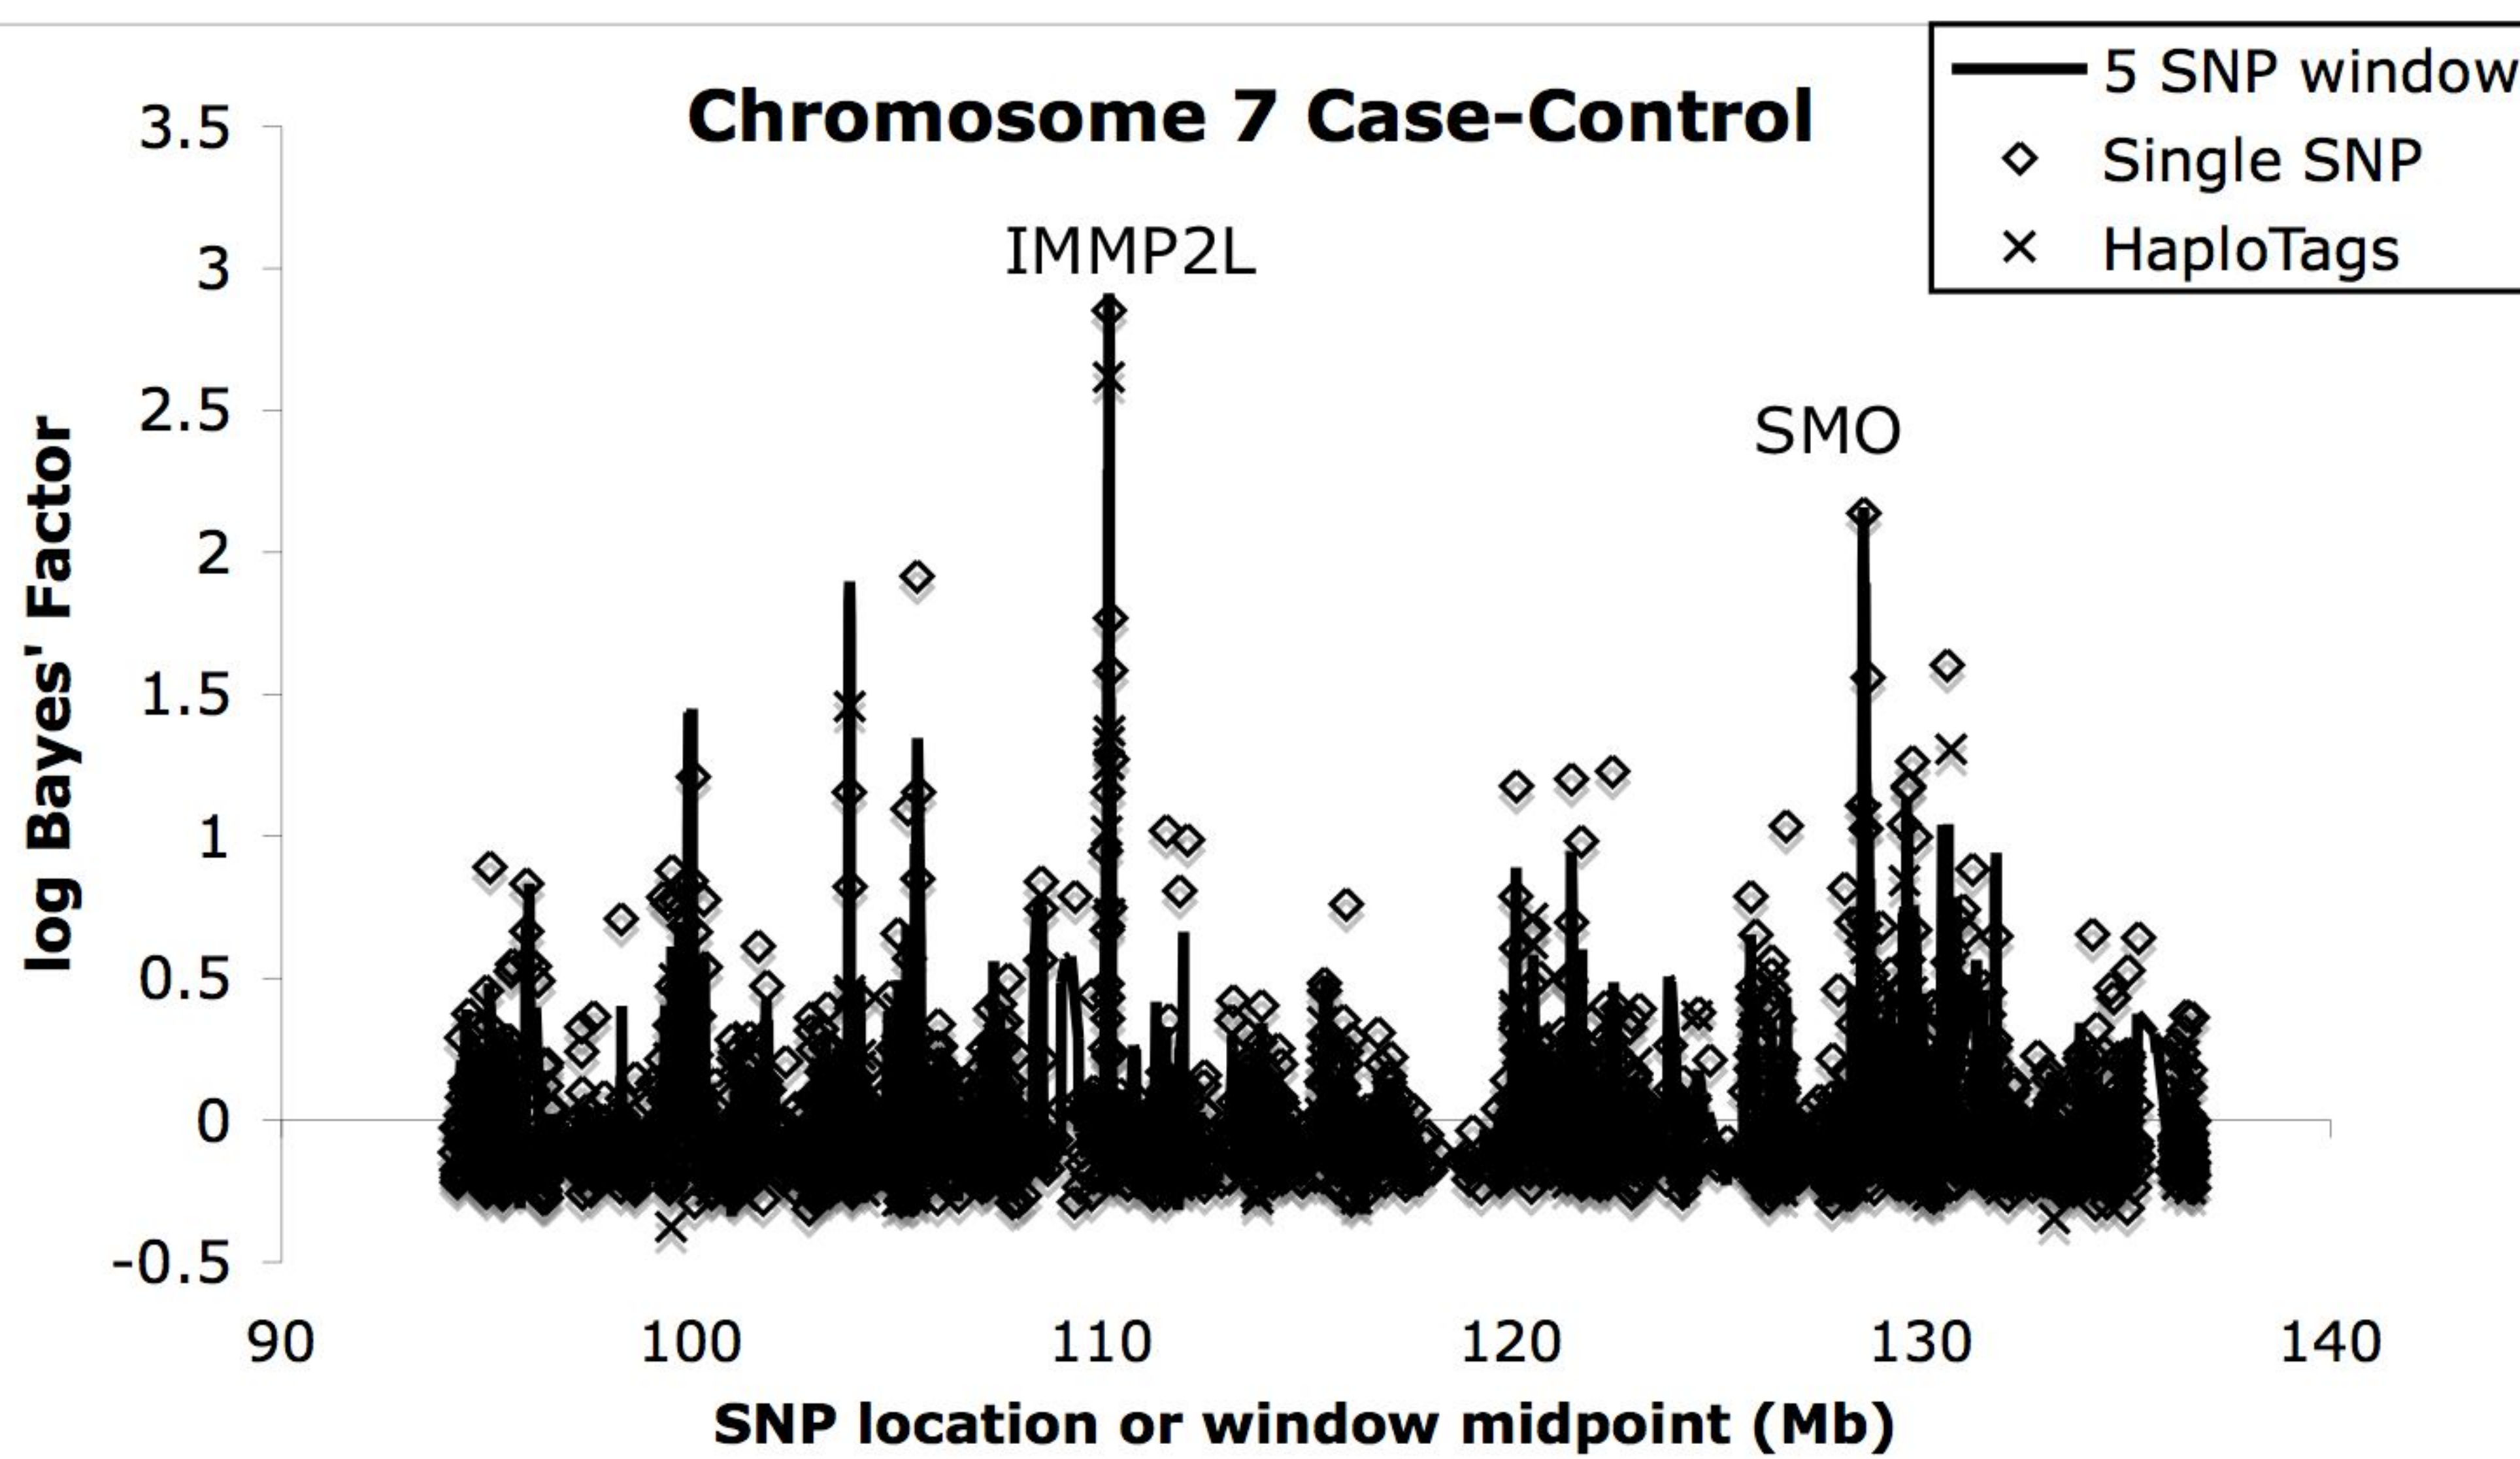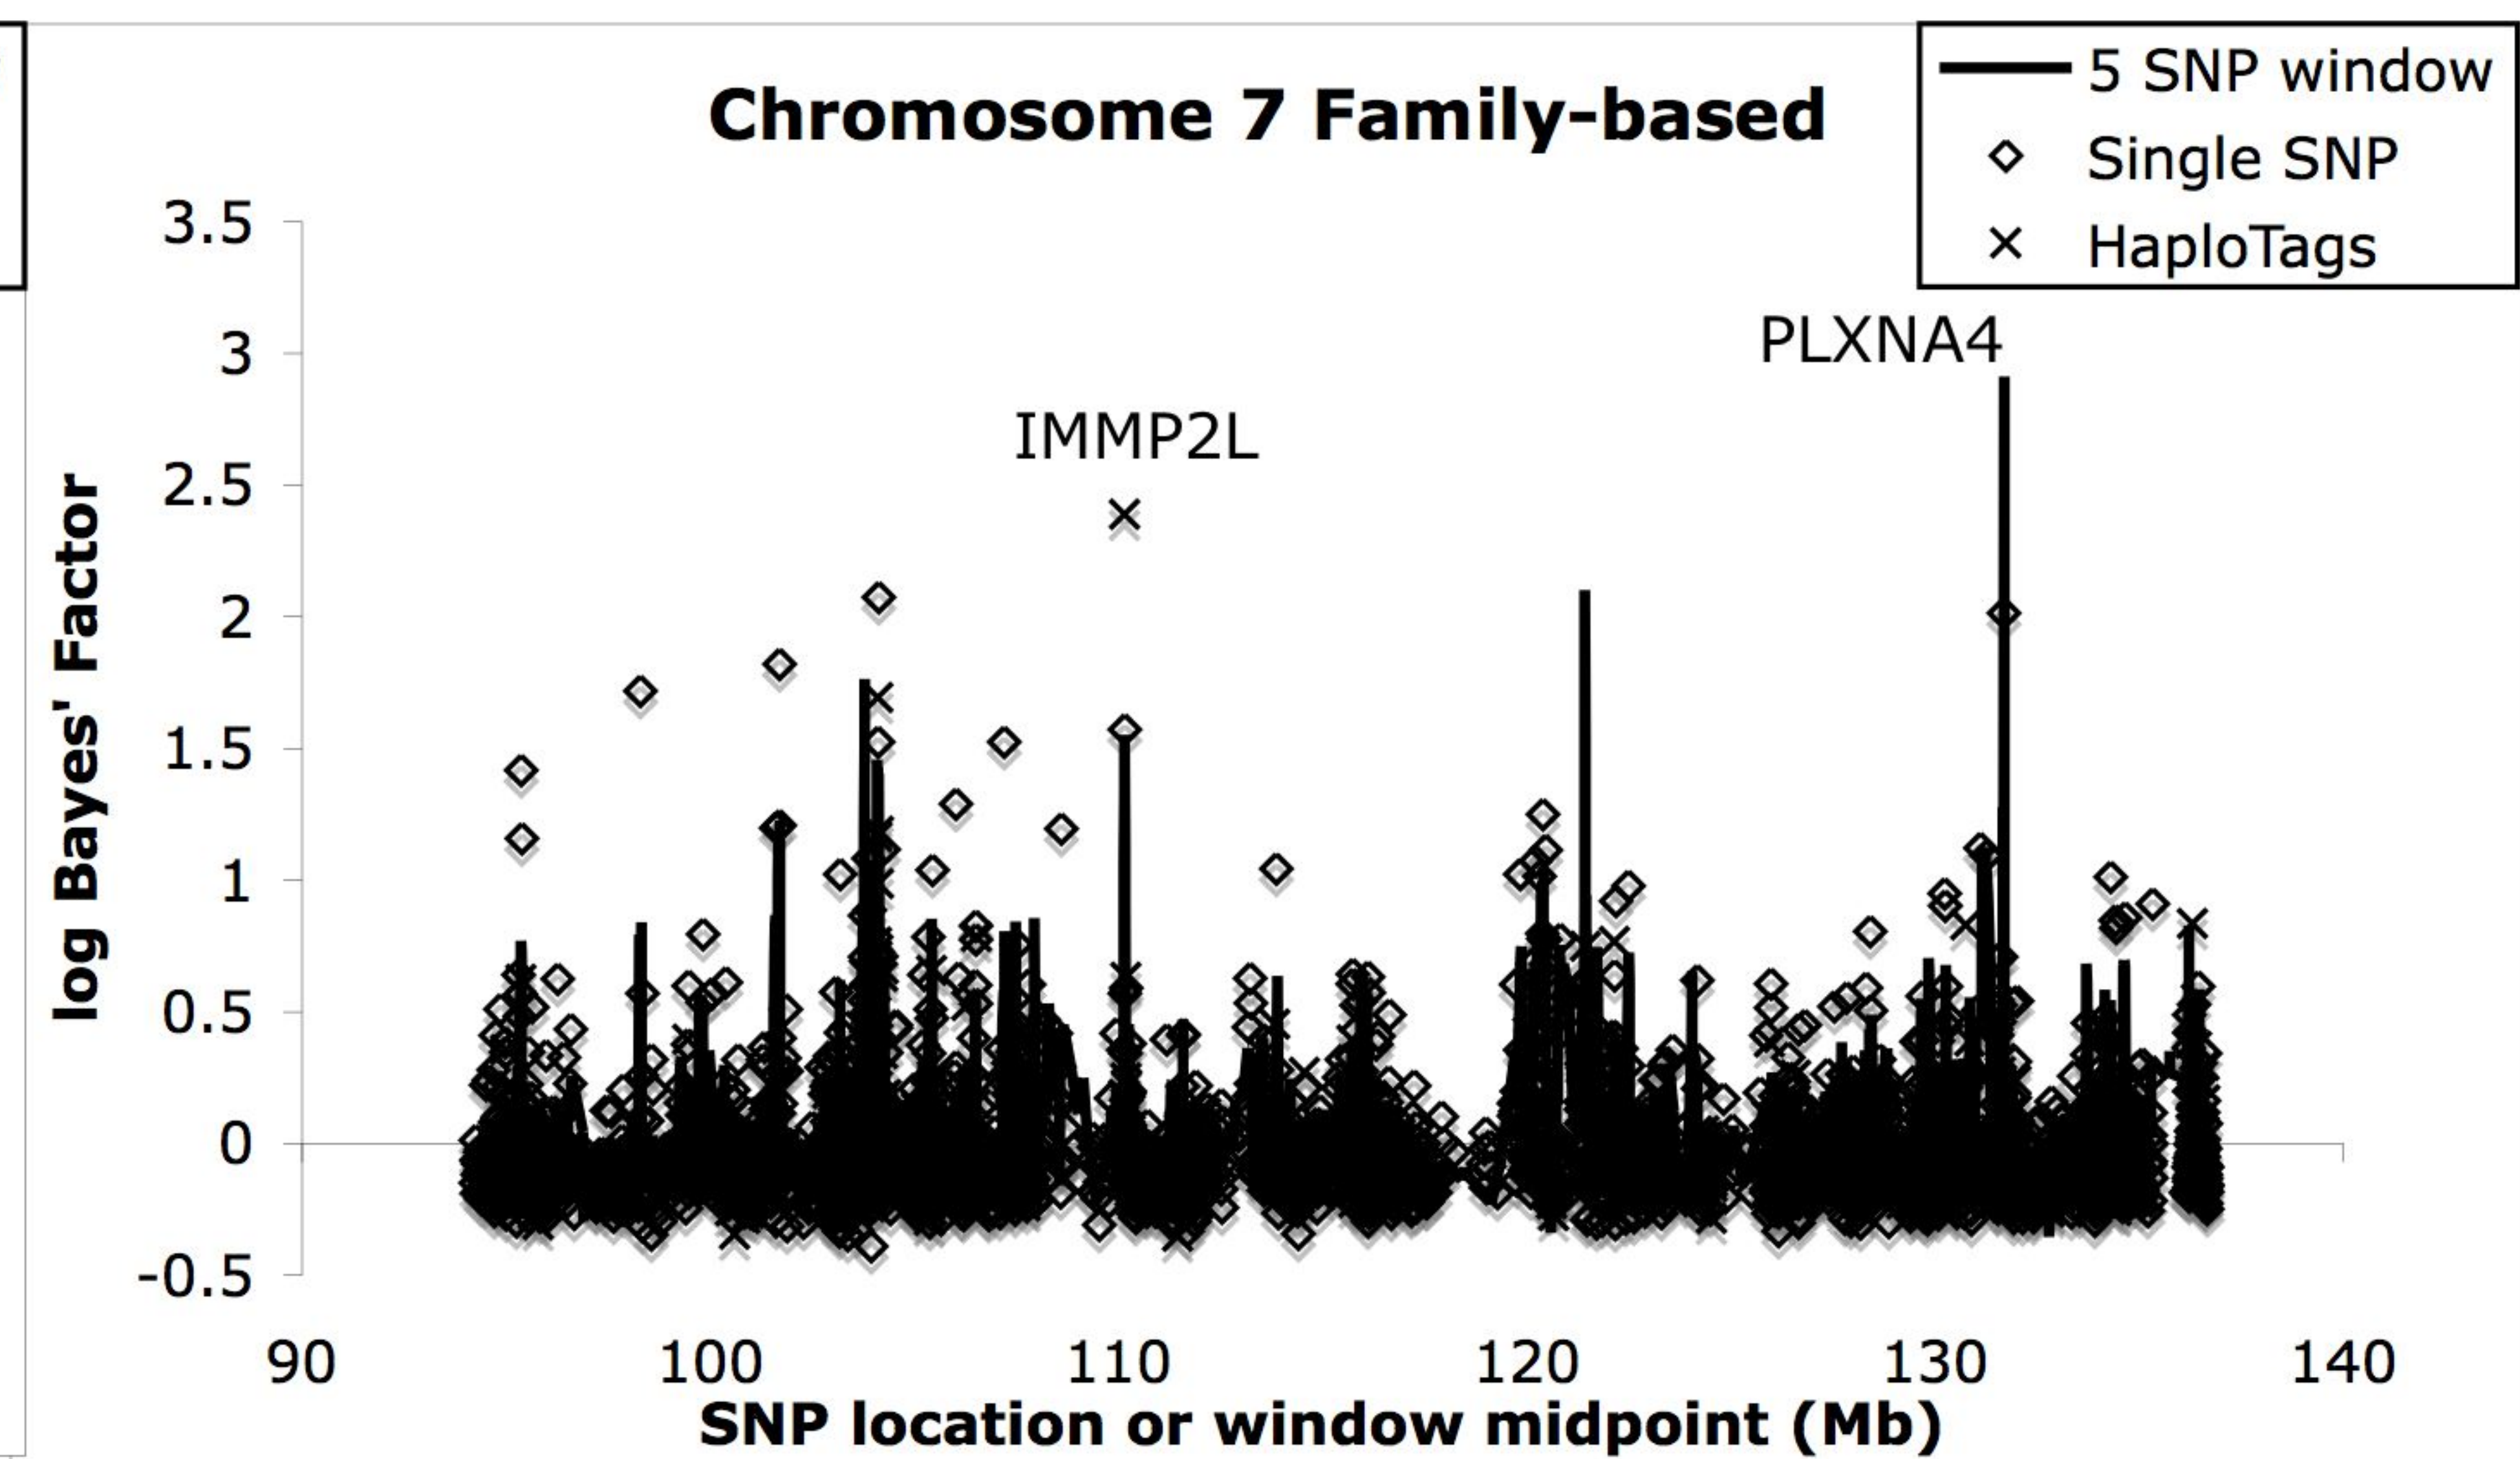

**Figure S1: GENEPM analysis**

**A**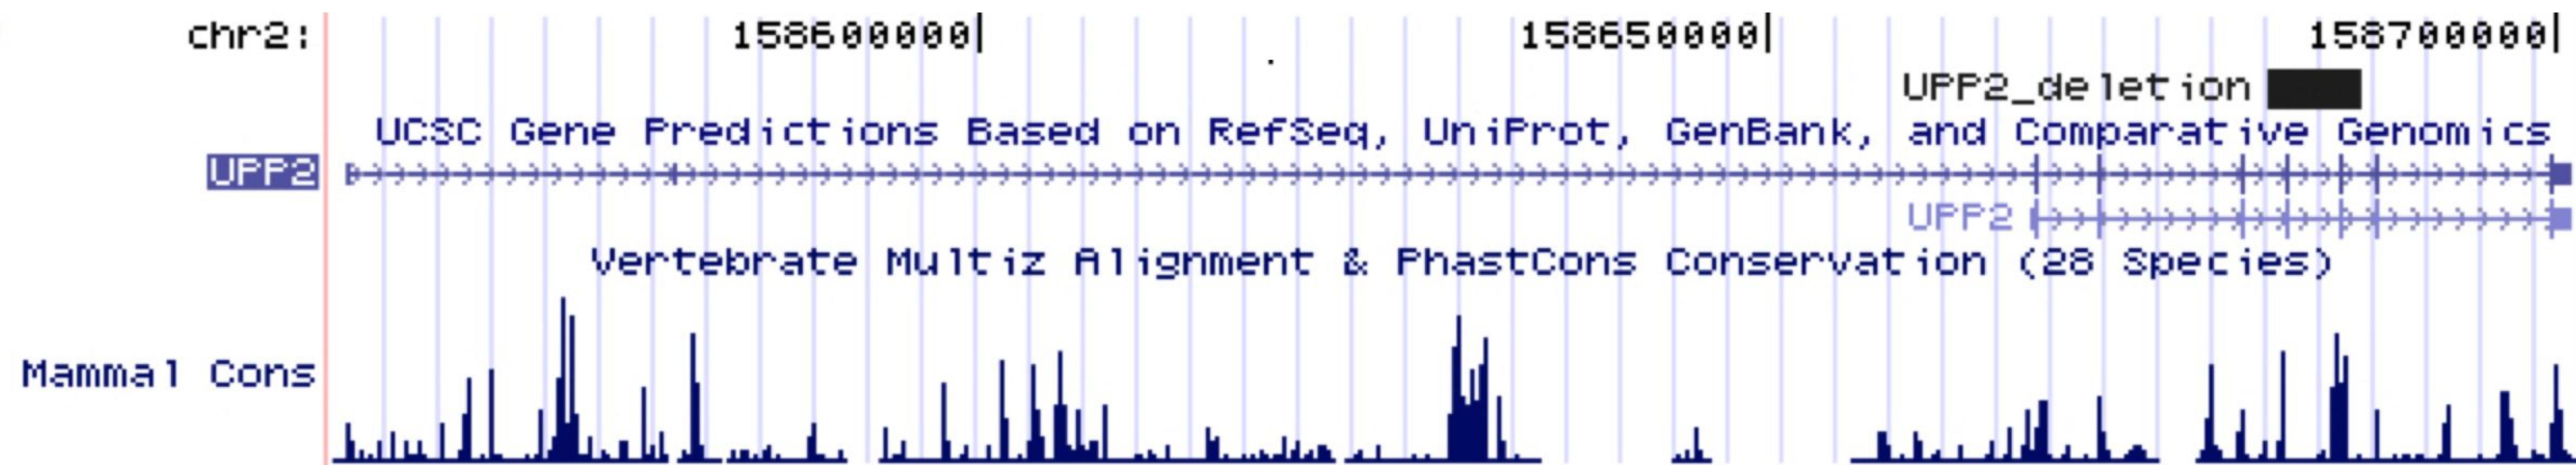**B**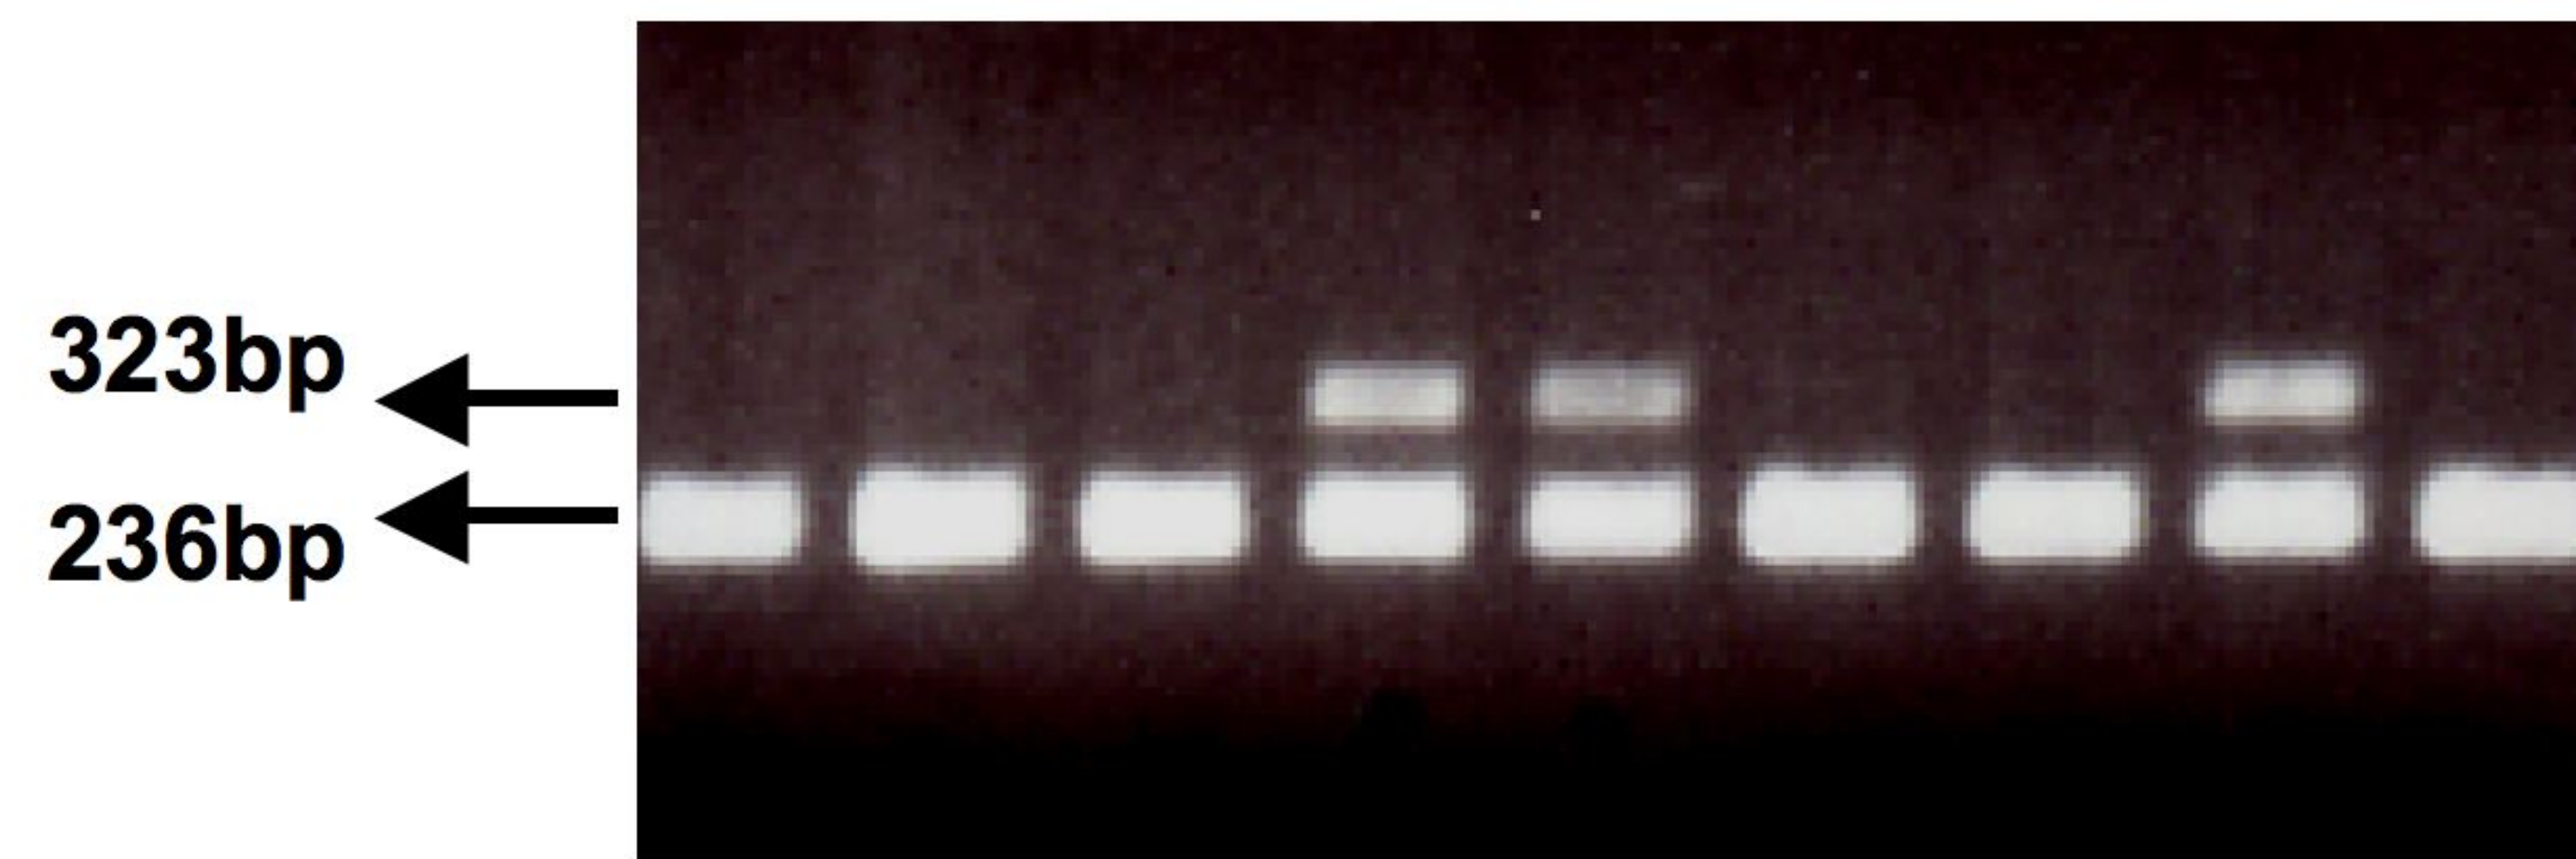

**Figure S2: deletion in *UPP2***

GoldenGate<sup>®</sup> array 1

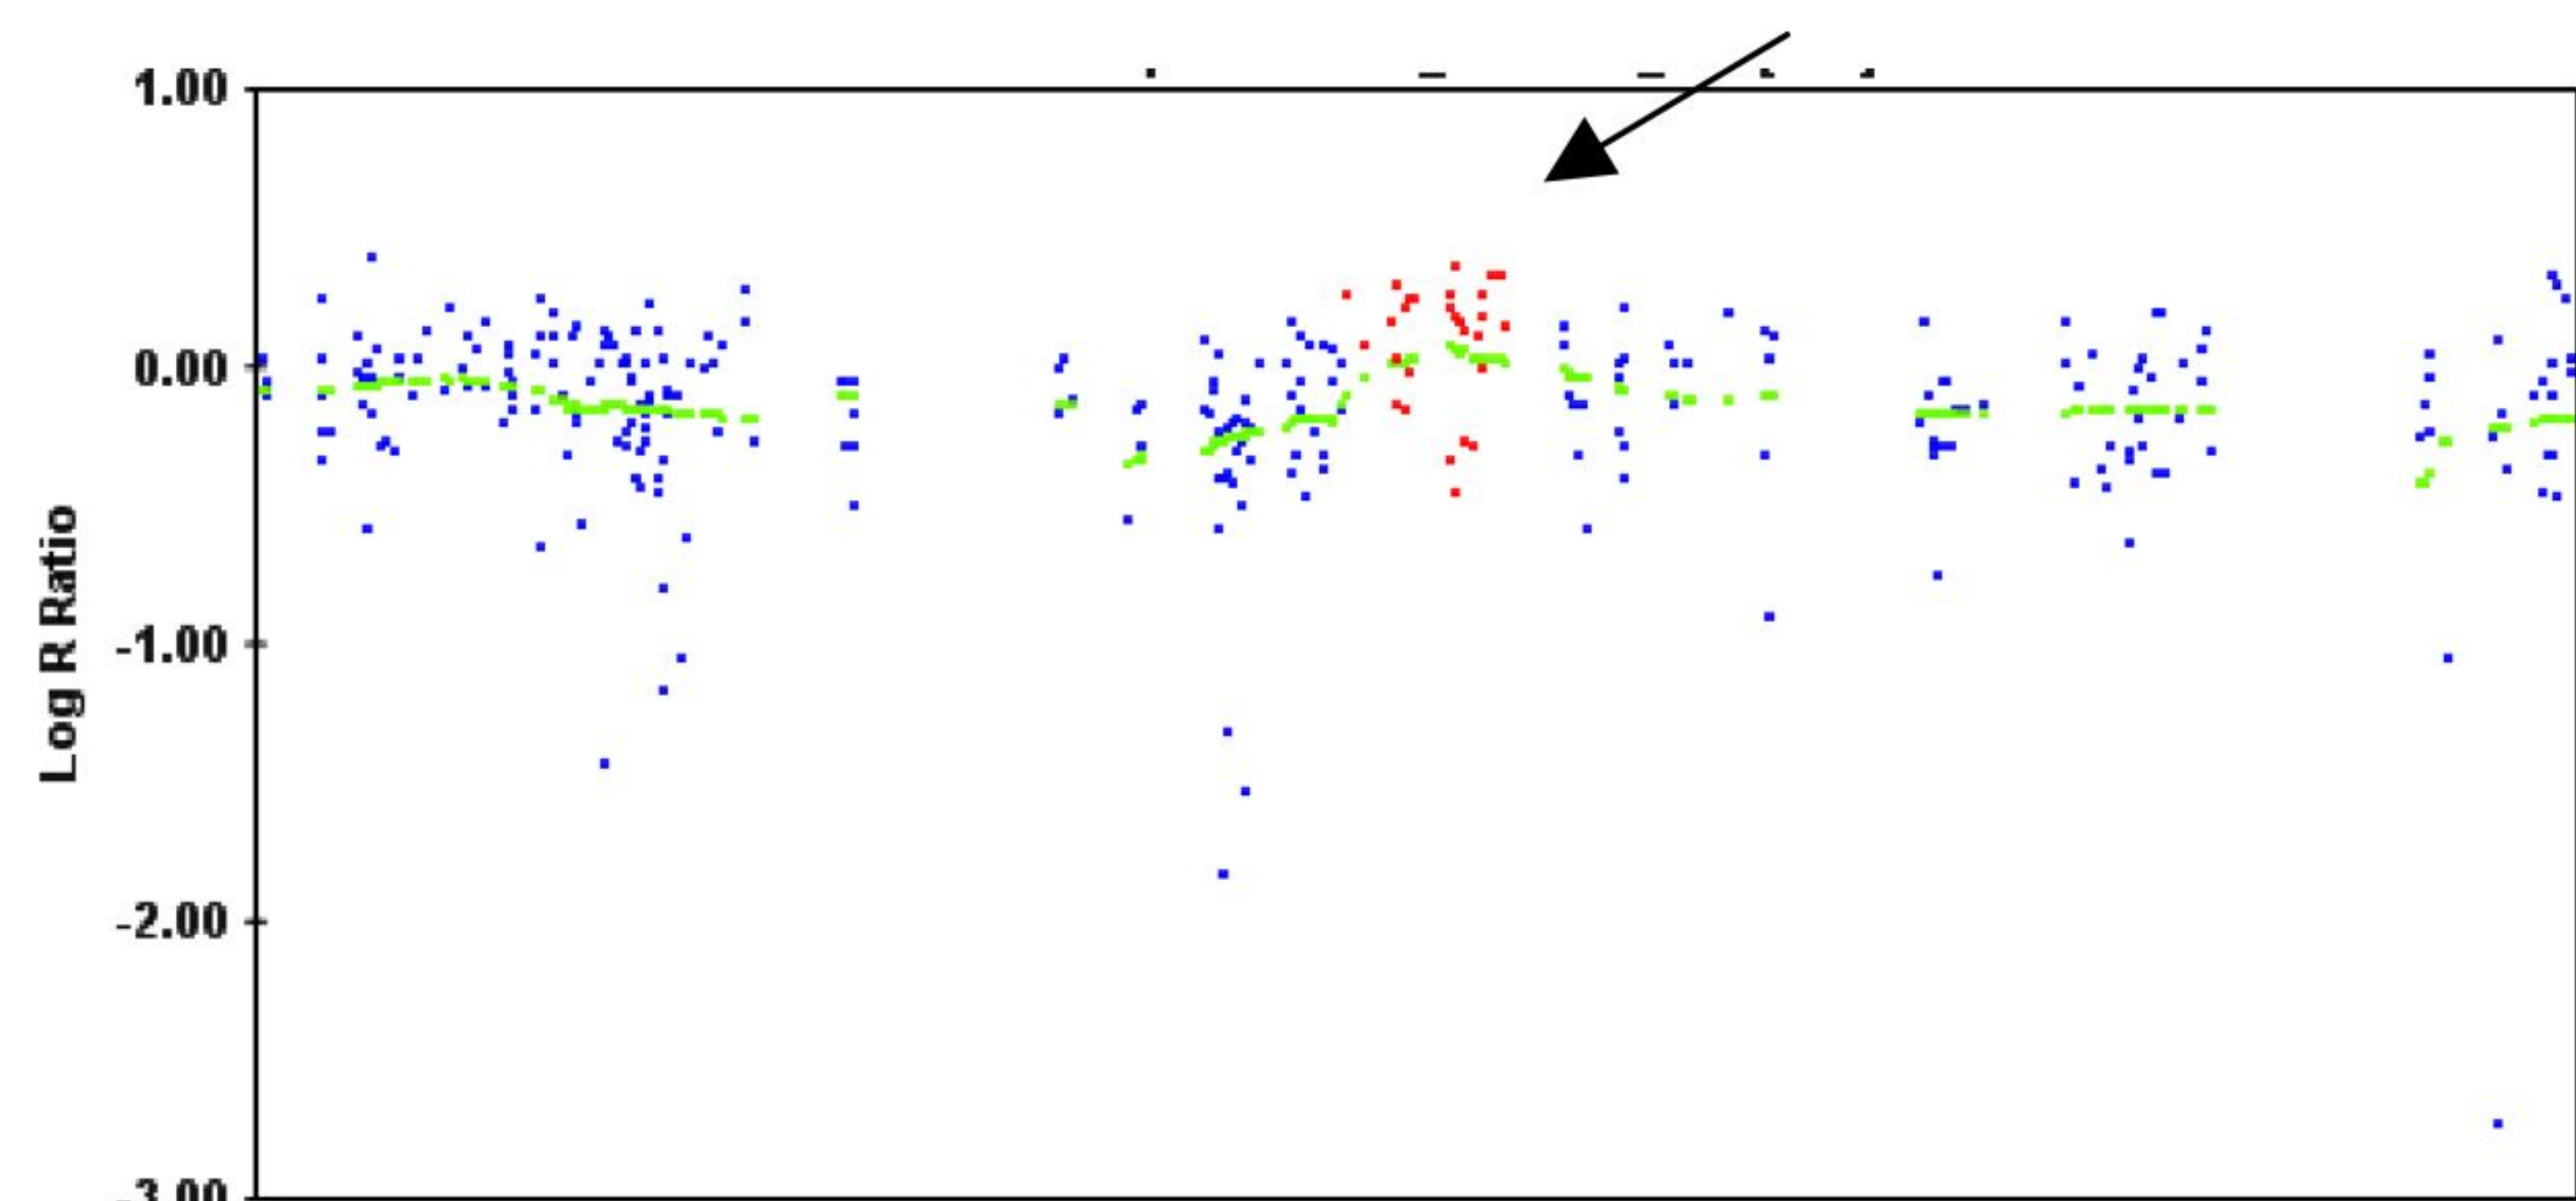

GT Samples / 148.5\_1304823\_F10 [454]

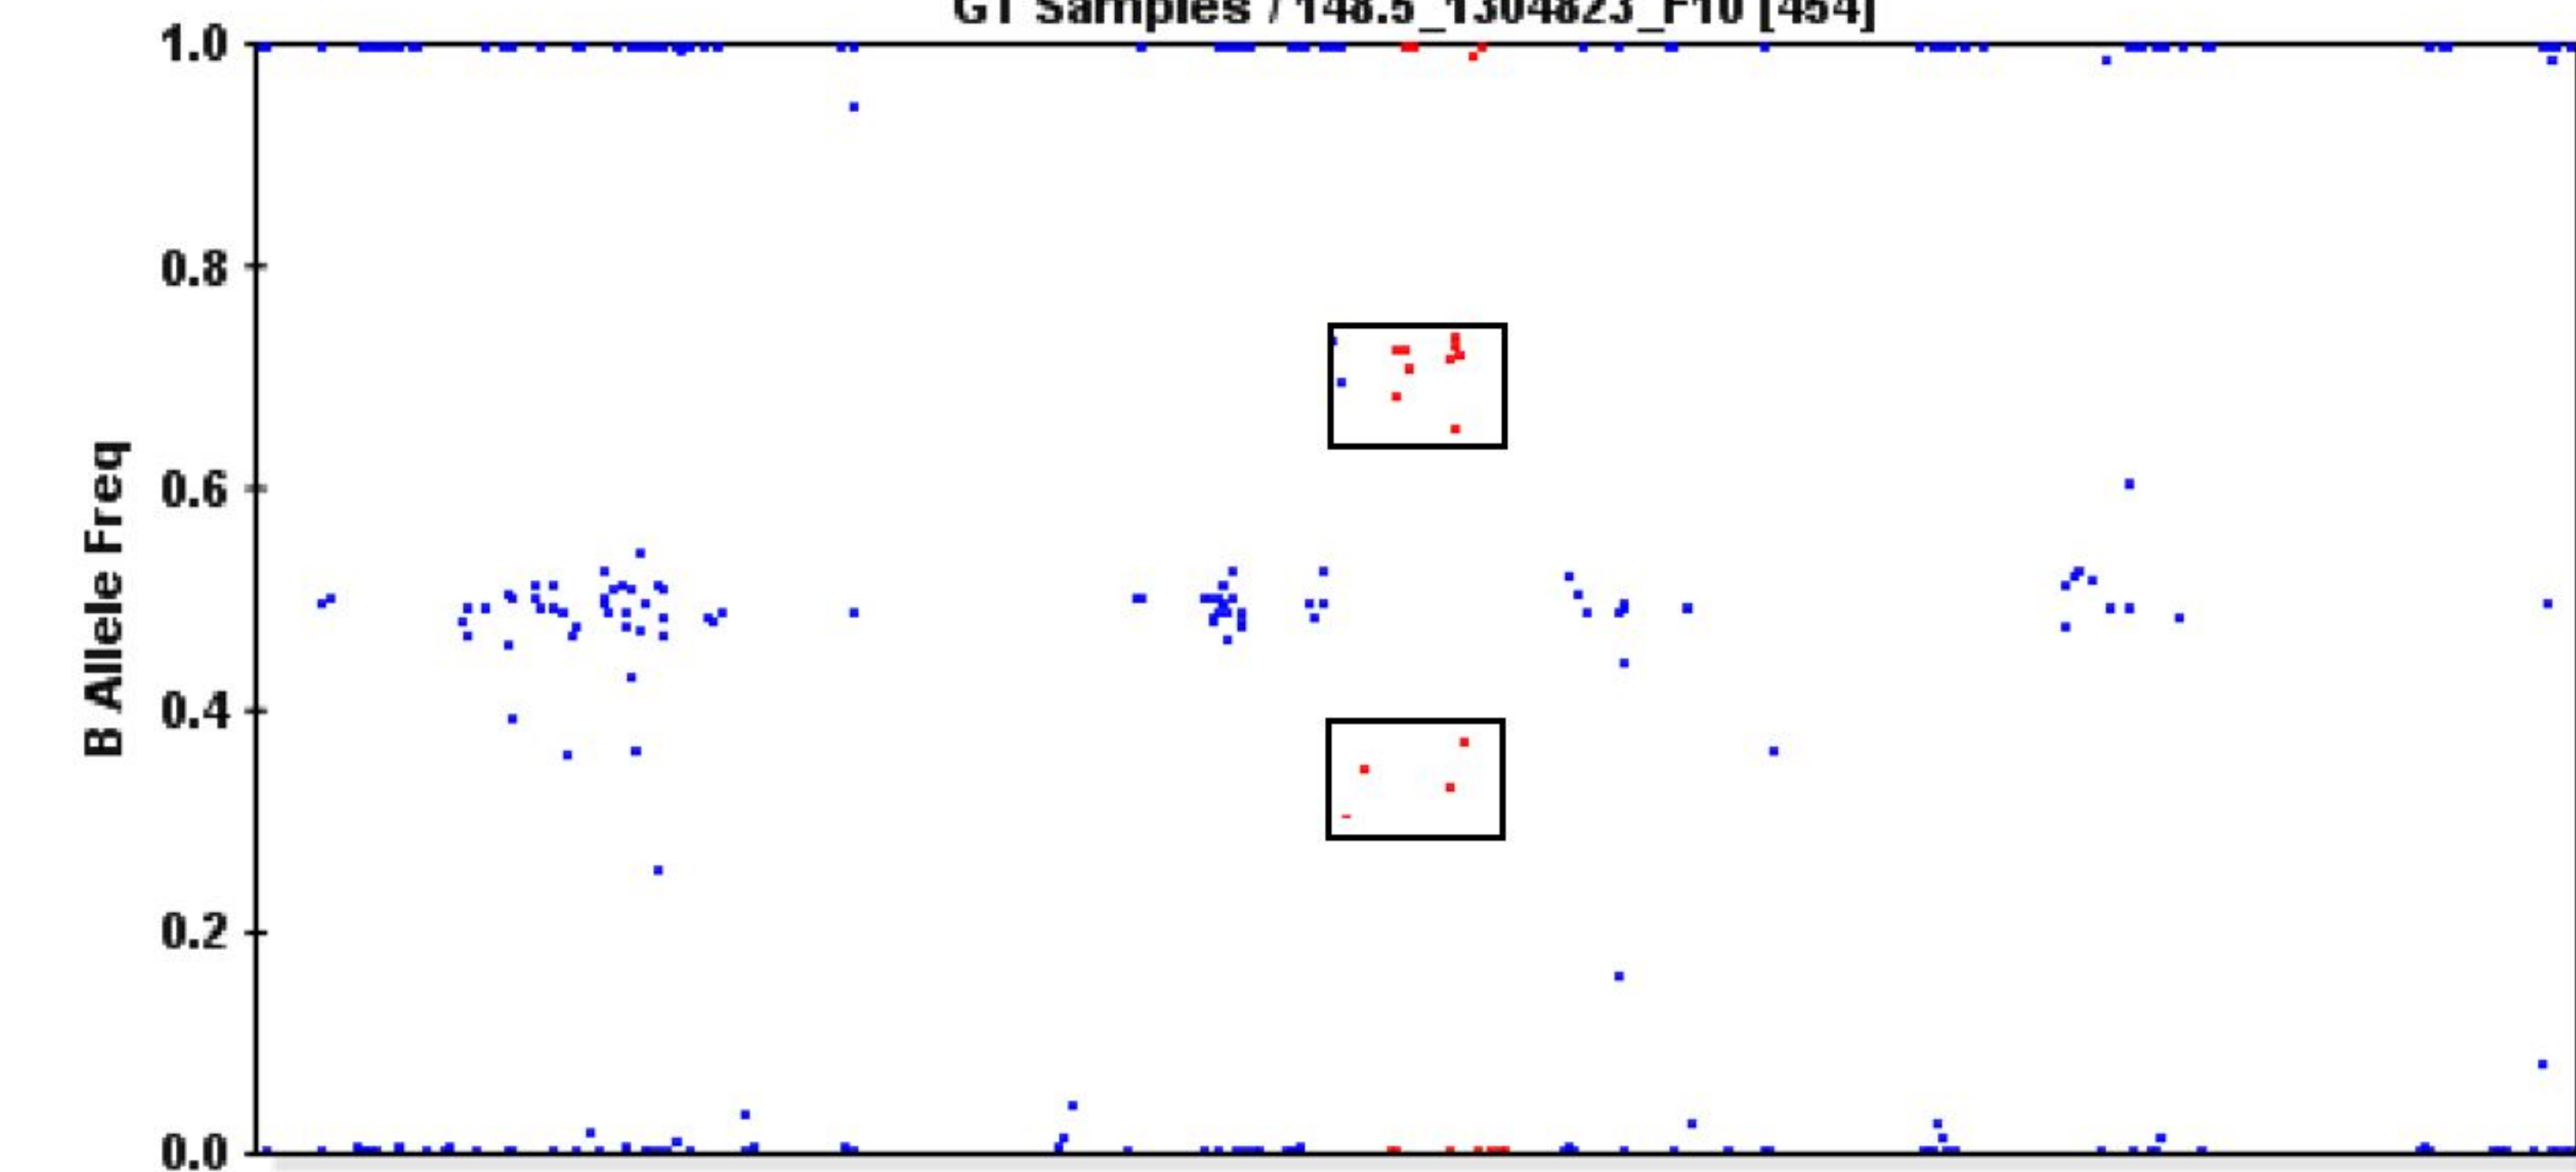

GoldenGate<sup>®</sup> array 2

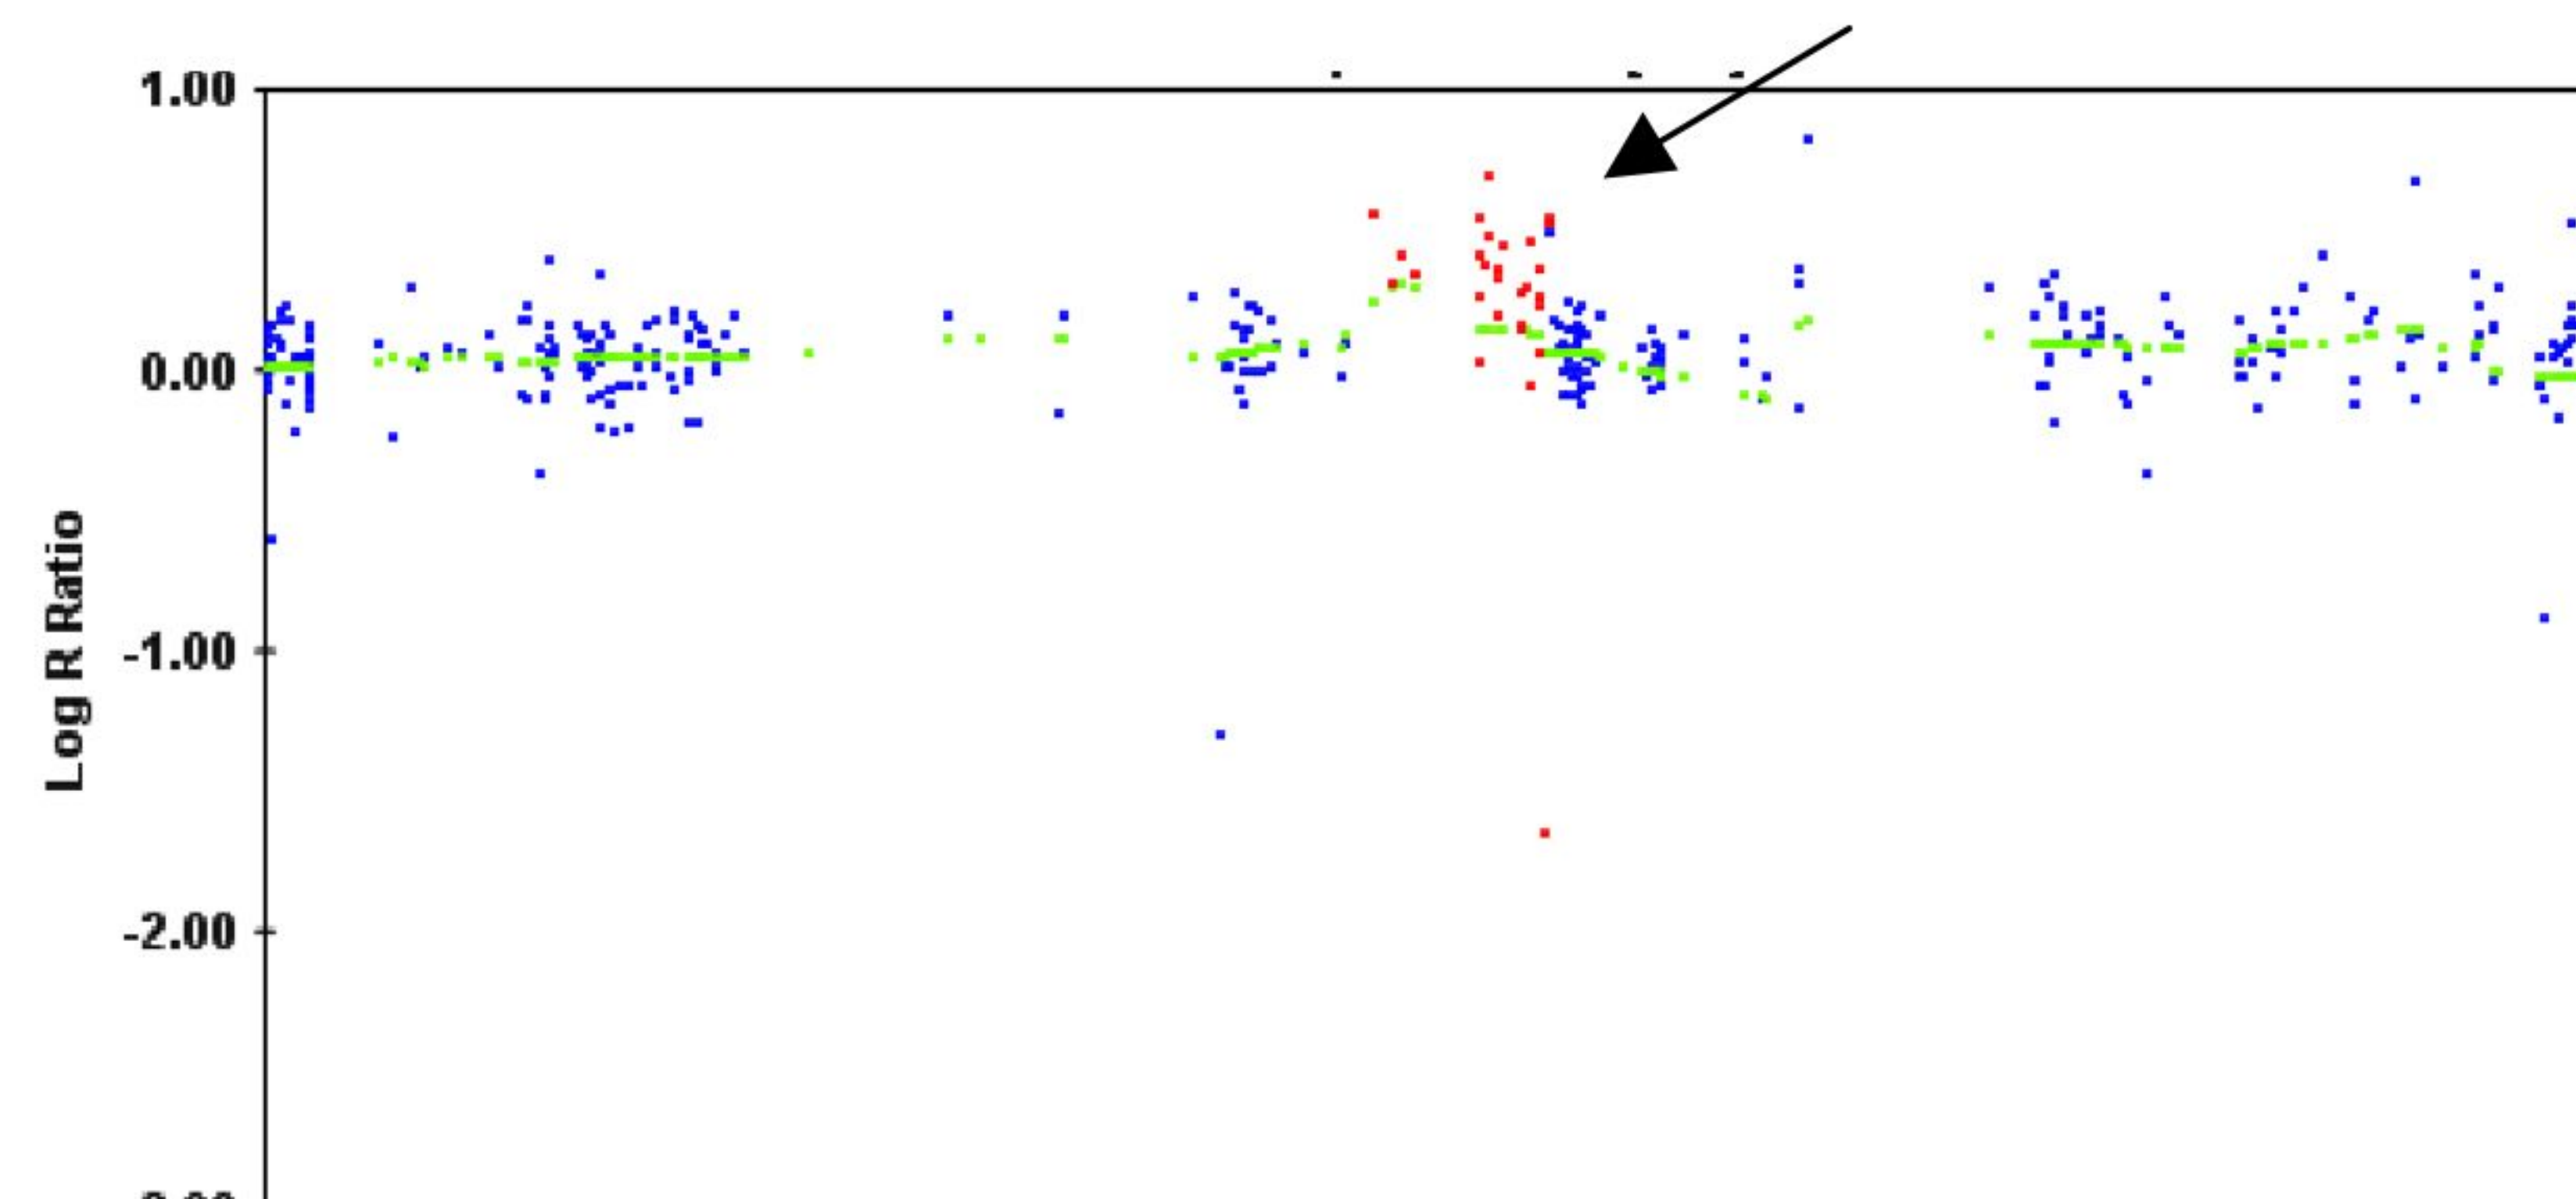

GT Samples / 148-5 [166]

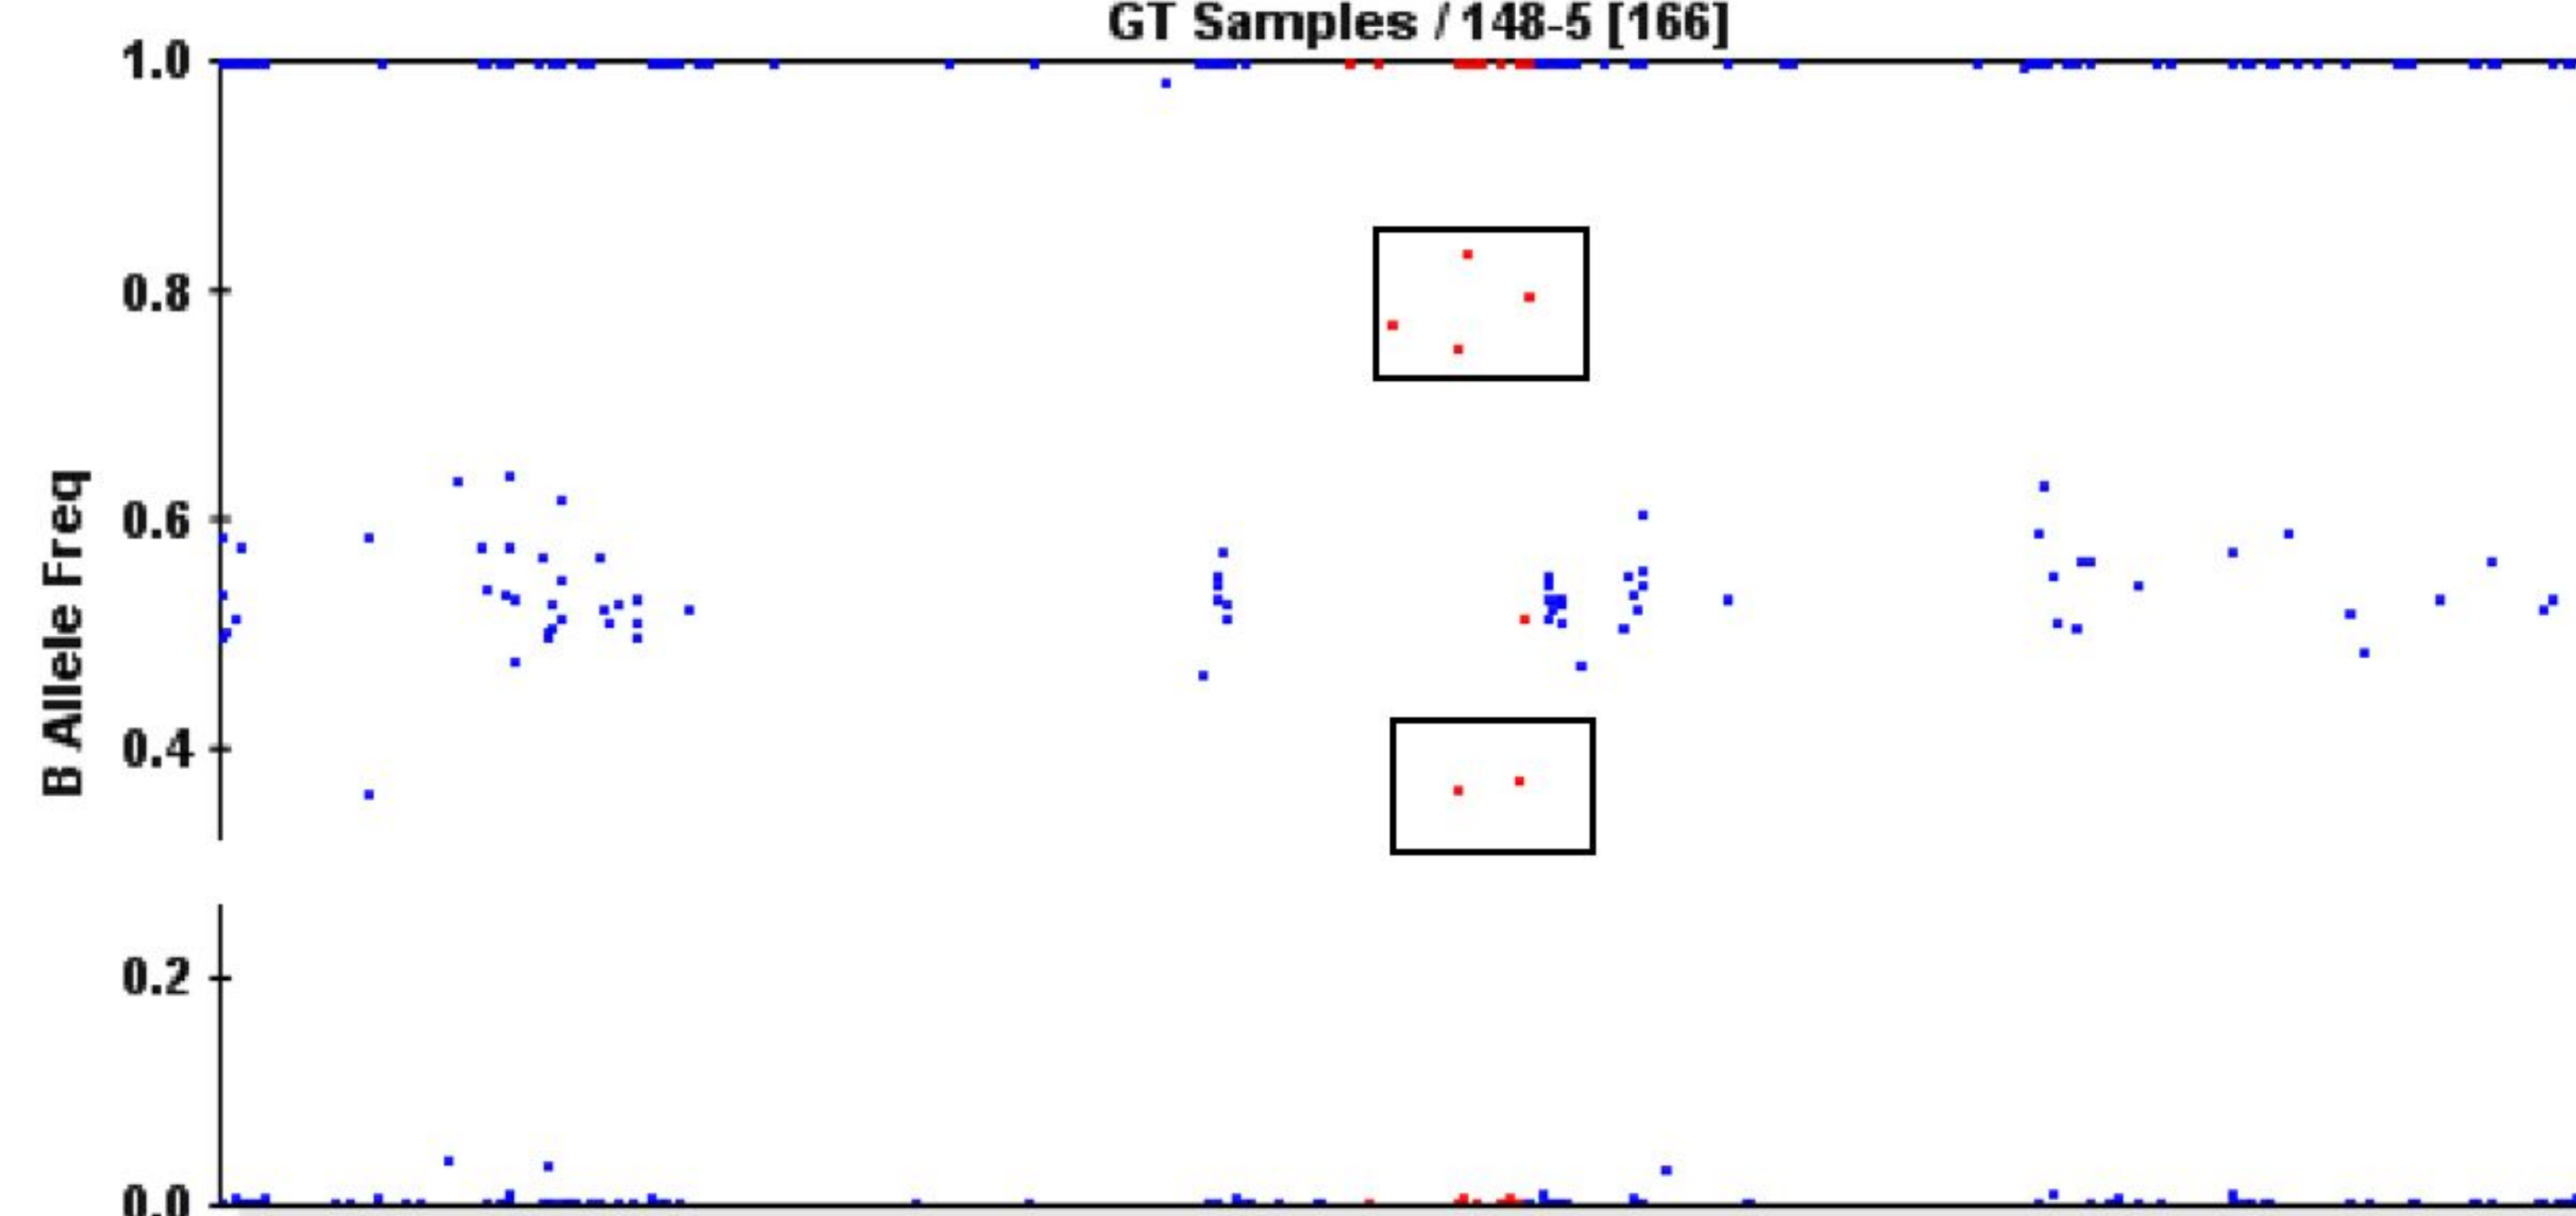

Figure S3: SNP data showing *IMMP2L* / *DOCK4* duplication in subject 13-3023-001.

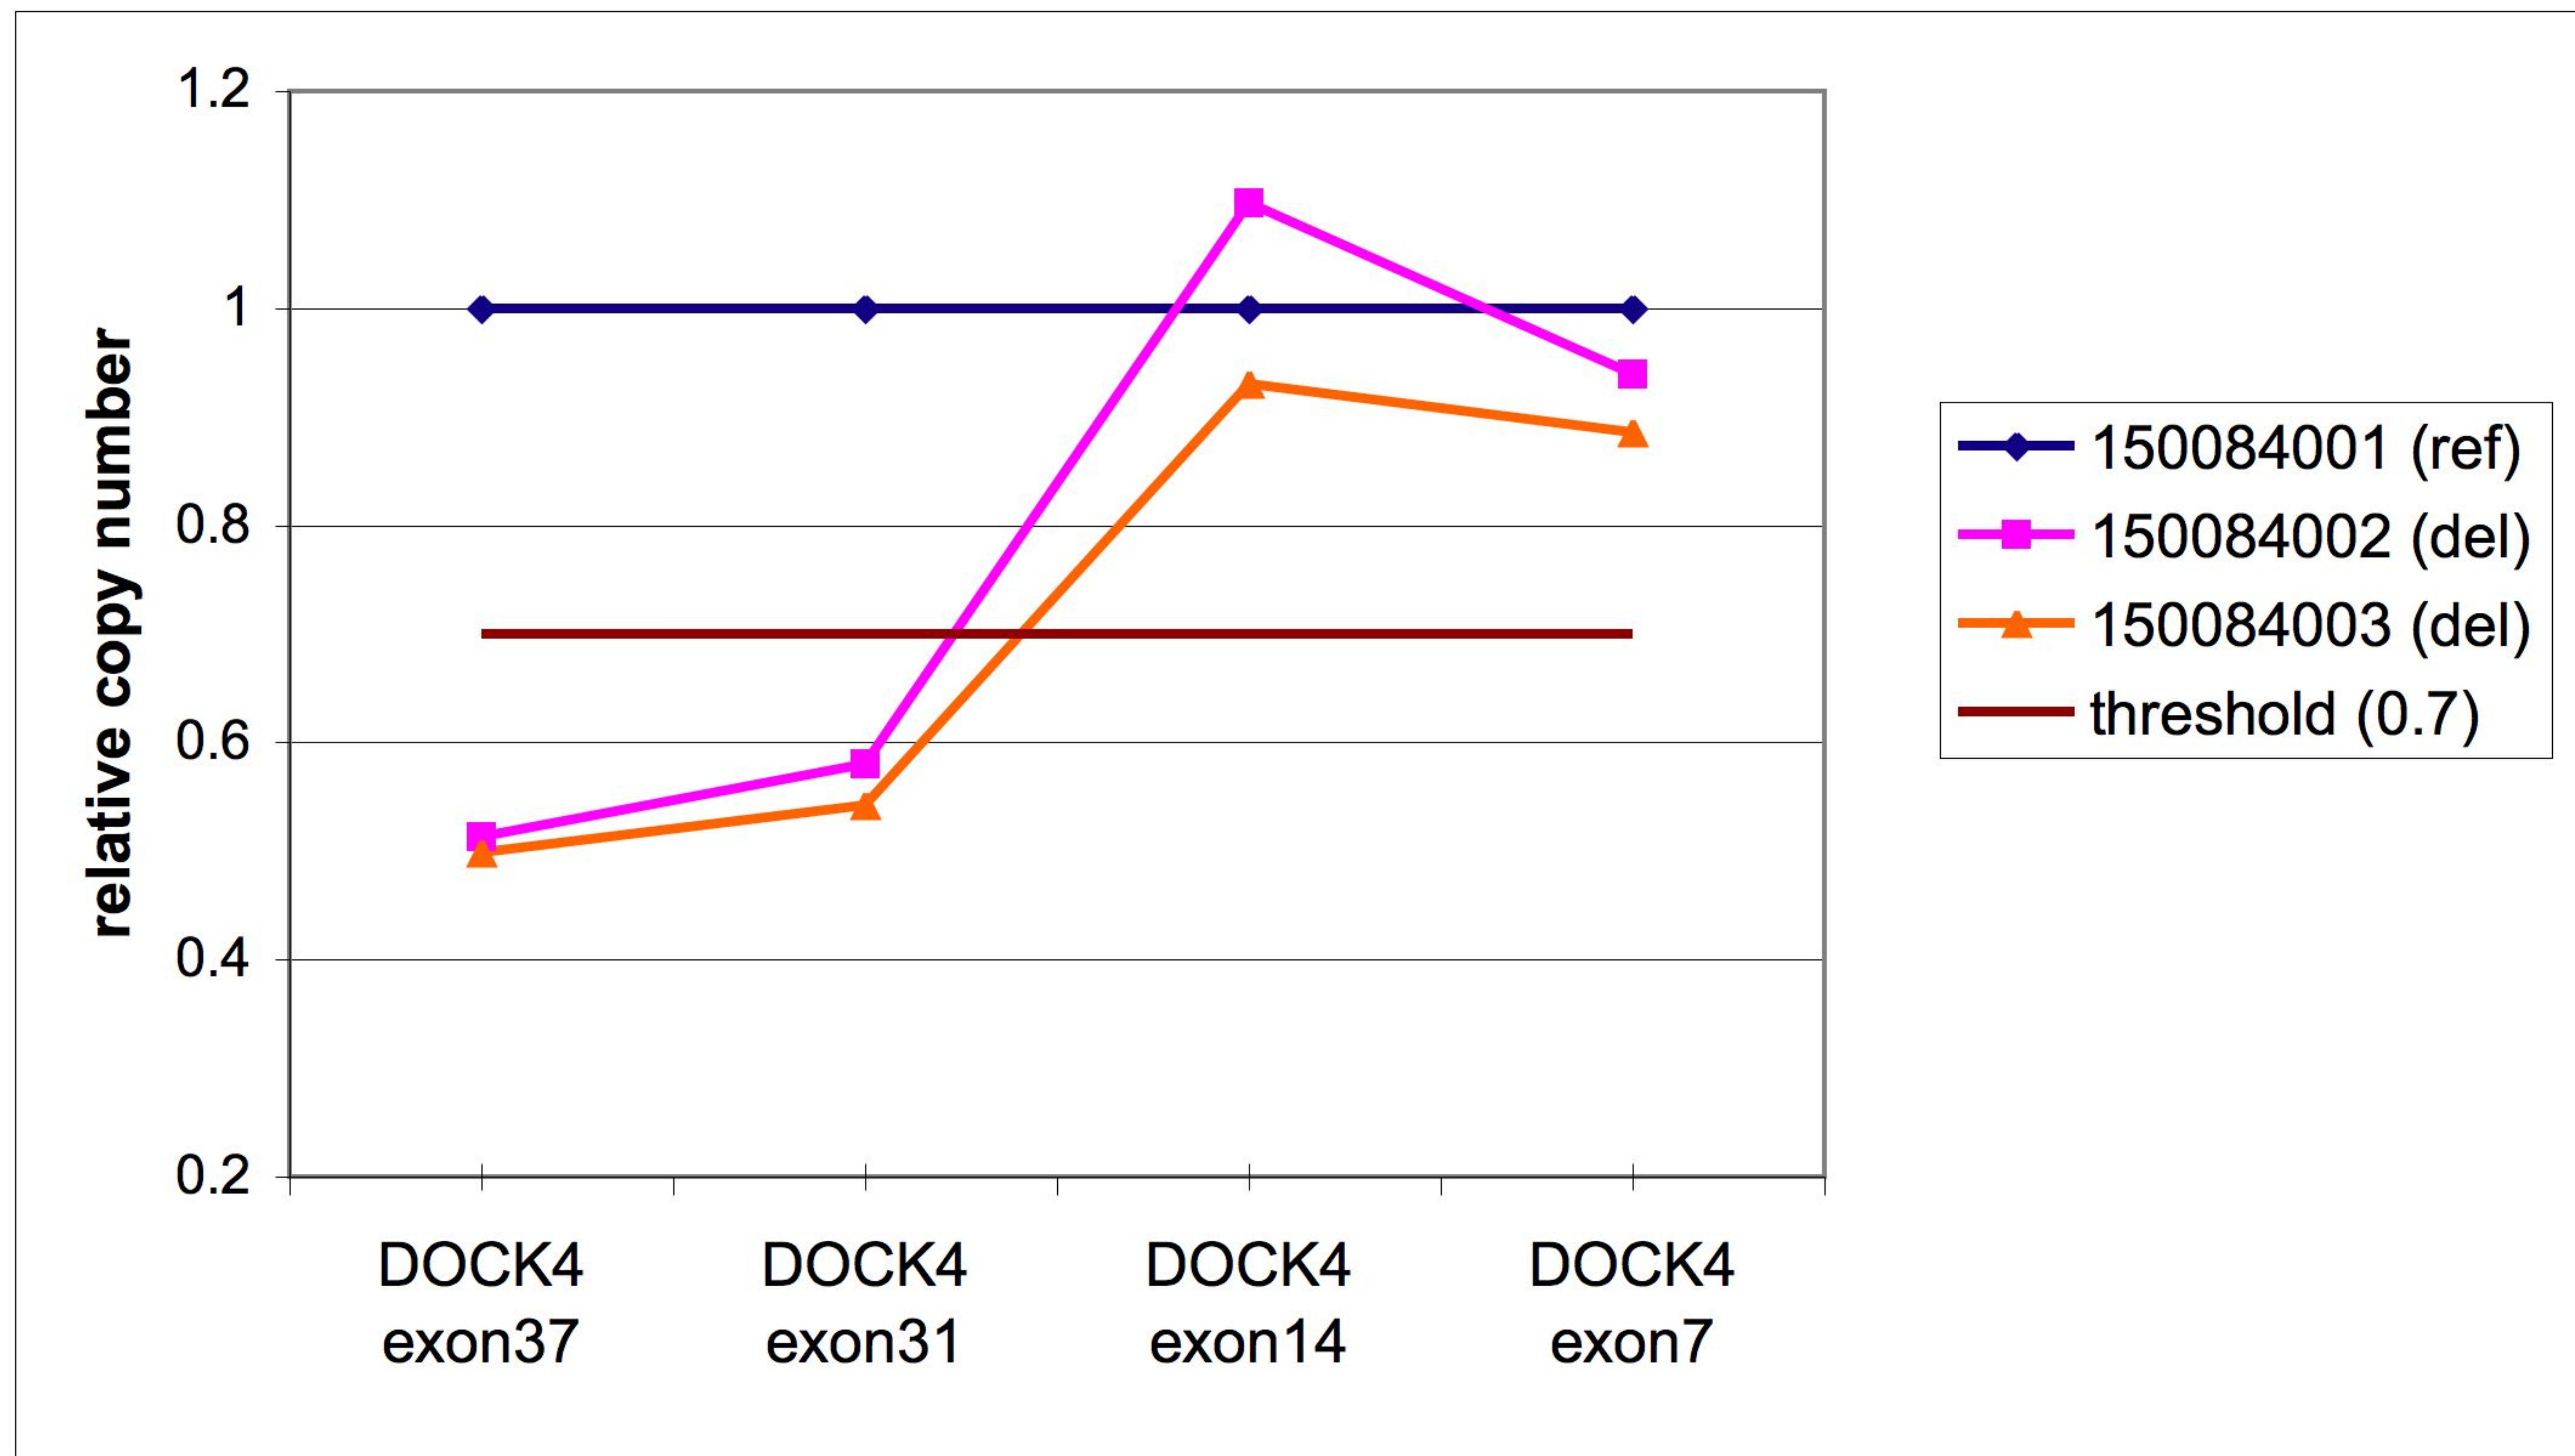

**Figure S4. *DOCK4* copy number determined by qPCR**

**Table S1. Results of family-based analysis of replication samples using UNPHASED.**

The table shows the nominal *P*-value for the likelihood ratio statistic, the allele frequency in affected offsprings and in untransmitted parental alleles (Ca-Freq, Co-Freq). Frequencies are reported for the risk allele detected in the primary association analysis. Flip-flop of associated allele is flagged by an asterisk. Nominal *P*-values<0.05 are in bold. UNPHASED family based analysis of the primary IMGSAc sample is in italics.

| SNP                              | Chr. | Gene                       | Alleles | Risk Allele | IMGSAc-PRIMARY<br>(family-based analysis) |              |              | IMGSAc-R<br>(294 affected subjects) |         |         | ND<br>(96 affected subjects) |         |         | IMGSAc-R + ND<br>(390 affected subjects) |         |         |
|----------------------------------|------|----------------------------|---------|-------------|-------------------------------------------|--------------|--------------|-------------------------------------|---------|---------|------------------------------|---------|---------|------------------------------------------|---------|---------|
|                                  |      |                            |         |             | <i>P</i> -value                           | Ca-Freq      | Co-Freq      | <i>P</i> -value                     | Ca-Freq | Co-Freq | <i>P</i> -value              | Ca-Freq | Co-Freq | <i>P</i> -value                          | Ca-Freq | Co-Freq |
| rs4664599                        | 2    | FMNL2                      | C/T     | T           | <i>0.0094</i>                             | <i>0.730</i> | <i>0.613</i> | 0.2014                              | 0.745   | 0.705   | 0.1891                       | 0.698   | 0.635   | 0.0747                                   | 0.732   | 0.689   |
| rs1427395                        | 2    | phastCons <sup>c</sup>     | A/T     | T           | <i>0.0066</i>                             | <i>0.540</i> | <i>0.416</i> | 0.3634                              | 0.564   | 0.532   | <b>0.0216</b>                | 0.500   | 0.387   | 0.0505                                   | 0.547   | 0.496   |
| rs6437133                        | 2    | UPP2                       | C/T     | C           | <i>0.0046</i>                             | <i>0.632</i> | <i>0.504</i> | 0.1630                              | 0.543   | 0.500   | <b>0.0395</b>                | 0.482*  | 0.599*  | 0.7106                                   | 0.529   | 0.519   |
| rs6709528                        | 2    | UPP2                       | C/T     | T           | <i>7.84E-04</i>                           | <i>0.603</i> | <i>0.451</i> | 0.3708                              | 0.498   | 0.471   | 0.0902                       | 0.458   | 0.545   | 0.9158                                   | 0.487   | 0.490   |
| rs12620556                       | 2    | LOC130940                  | A/G     | A           | <i>0.0108</i>                             | <i>0.952</i> | <i>0.889</i> | 0.8454                              | 0.899   | 0.905   | <b>0.0235</b>                | 0.905*  | 0.965*  | 0.2247                                   | 0.901   | 0.920   |
| rs764660                         | 2    | SCN2A                      | A/C     | C           | <i>0.0050</i>                             | <i>0.373</i> | <i>0.255</i> | 0.6841                              | 0.326   | 0.334   | 0.8013                       | 0.303   | 0.290   | 0.8341                                   | 0.320   | 0.325   |
| rs1020626                        | 2    | FAM130A2                   | C/T     | T           | <i>0.2479</i>                             | <i>0.508</i> | <i>0.455</i> | 0.2057                              | 0.437   | 0.391   | 0.5230                       | 0.365   | 0.397   | 0.3869                                   | 0.419   | 0.396   |
| rs10930170                       | 2    | FAM130A2                   | A/G     | G           | <i>0.4706</i>                             | <i>0.397</i> | <i>0.365</i> | 0.3667                              | 0.330   | 0.299   | 0.8628                       | 0.307   | 0.299   | 0.3943                                   | 0.324   | 0.302   |
| rs829958 (proxy for rs829957)    | 2    | NOSTRIN                    | A/G     | G           | <i>0.0137</i>                             | <i>0.220</i> | <i>0.130</i> | 0.5600                              | 0.140   | 0.129   | 0.2149                       | 0.174   | 0.127   | 0.2435                                   | 0.149   | 0.127   |
| rs6433093                        | 2    | NOSTRIN                    | A/C     | A           | <i>0.1133</i>                             | <i>0.344</i> | <i>0.276</i> | 0.5168                              | 0.298   | 0.276   | 0.2759                       | 0.300   | 0.249   | 0.2621                                   | 0.299   | 0.266   |
| rs7583629                        | 2    | NOSTRIN                    | A/G     | A           | <i>0.0027</i>                             | <i>0.262</i> | <i>0.148</i> | 0.4710                              | 0.172   | 0.157   | 0.7947                       | 0.172   | 0.162   | 0.4405                                   | 0.172   | 0.155   |
| rs482435 <sup>a</sup>            | 2    | NOSTRIN                    | C/T     | C           | <i>0.0156</i>                             | <i>0.381</i> | <i>0.278</i> | 0.3782                              | 0.333   | 0.302   | 0.9429                       | 0.309   | 0.305   | 0.3995                                   | 0.327   | 0.301   |
| rs12692976                       | 2    | SLC25A12                   | G/T     | T           | <i>0.0106</i>                             | <i>0.675</i> | <i>0.562</i> | 0.6697                              | 0.647   | 0.657   | 0.5861                       | 0.601   | 0.572   | 0.9522                                   | 0.635   | 0.637   |
| rs17705978                       | 2    | RAPGEF4                    | A/G     | G           | <i>0.2701</i>                             | <i>0.070</i> | <i>0.075</i> | 0.6958                              | 0.070   | 0.075   | 0.0912                       | 0.026   | 0.062   | 0.2862                                   | 0.058   | 0.072   |
| rs6758260                        | 2    | RAPGEF4                    | A/G     | A           | <i>0.0142</i>                             | <i>0.189</i> | <i>0.179</i> | 0.7307                              | 0.189   | 0.179   | 0.5899                       | 0.153   | 0.133   | 0.5662                                   | 0.179   | 0.166   |
| rs13007575                       | 2    | phastCons <sup>c</sup>     | A/G     | A           | <i>0.0034</i>                             | <i>0.960</i> | <i>0.890</i> | 0.1337                              | 0.921   | 0.946   | <b>0.0063</b>                | 0.958   | 0.886   | 0.8726                                   | 0.931   | 0.929   |
| rs1866925 (proxy for rs6717587)  | 2    | phastCons <sup>c</sup>     | G/T     | G           | <i>0.0376</i>                             | <i>0.885</i> | <i>0.820</i> | 0.3546                              | 0.790   | 0.768   | 0.5508                       | 0.821   | 0.798   | 0.2756                                   | 0.799   | 0.774   |
| rs1434087 <sup>a</sup>           | 2    | OSBPL6                     | C/T     | T           | <i>0.0679</i>                             | <i>0.960</i> | <i>0.923</i> | <b>0.0399</b>                       | 0.928   | 0.890   | 0.7597                       | 0.916   | 0.925   | 0.0988                                   | 0.925   | 0.898   |
| rs22276573 <sup>a</sup>          | 2    | ZNF533                     | G/T     | T           | <i>0.0184</i>                             | <i>0.631</i> | <i>0.531</i> | 0.1910                              | 0.585   | 0.545   | 0.1021                       | 0.516   | 0.605   | 0.7569                                   | 0.569   | 0.561   |
| rs7590028 <sup>a</sup>           | 2    | ZNF533                     | C/T     | T           | <i>0.0688</i>                             | <i>0.579</i> | <i>0.500</i> | 0.2749                              | 0.519   | 0.482   | 0.1572                       | 0.464   | 0.541   | 0.8250                                   | 0.505   | 0.496   |
| rs11885327                       | 2    | ZNF533                     | C/T     | C           | <i>5.53E-04</i>                           | <i>0.722</i> | <i>0.574</i> | 0.4270                              | 0.629   | 0.597   | 0.9218                       | 0.621   | 0.626   | 0.5295                                   | 0.627   | 0.607   |
| rs1964081 <sup>a</sup>           | 2    | ZNF533                     | A/G     | A           | <i>8.43E-04</i>                           | <i>0.901</i> | <i>0.791</i> | 0.7606                              | 0.872   | 0.870   | 0.4805                       | 0.853   | 0.826   | 0.8637                                   | 0.867   | 0.859   |
| rs11674376                       | 2    | ZNF533                     | C/T     | C           | <i>0.0029</i>                             | <i>0.385</i> | <i>0.258</i> | 0.9504                              | 0.277   | 0.275   | 0.9965                       | 0.224   | 0.224   | 0.9528                                   | 0.263   | 0.263   |
| rs723390                         | 2    | nn (Affy 10K)              | A/G     | A           | <i>0.0073</i>                             | <i>0.628</i> | <i>0.498</i> | 0.8900                              | 0.568   | 0.575   | 0.4667                       | 0.537   | 0.574   | 0.6395                                   | 0.560   | 0.572   |
| rs3755248                        | 2    | TFPI                       | C/T     | T           | <i>0.0039</i>                             | <i>0.718</i> | <i>0.597</i> | 0.2140                              | 0.668   | 0.636   | 0.7806                       | 0.626   | 0.613   | 0.1937                                   | 0.658   | 0.628   |
| rs16829088 (proxy for rs7573488) | 2    | TFPI                       | A/G     | G           | <i>0.0034</i>                             | <i>0.794</i> | <i>0.684</i> | 0.9973                              | 0.732   | 0.730   | 0.2738                       | 0.702   | 0.647   | 0.5838                                   | 0.724   | 0.710   |
| rs3811608                        | 2    | FLJ20160                   | C/T     | T           | <i>0.0045</i>                             | <i>0.877</i> | <i>0.782</i> | 0.0712                              | 0.820   | 0.773   | nd                           | nd      | nd      | nd                                       | nd      | nd      |
| rs6757698                        | 2    | FLJ20160                   | C/T     | C           | <i>0.0065</i>                             | <i>0.369</i> | <i>0.264</i> | 0.7289                              | 0.288   | 0.304   | 0.3804                       | 0.358   | 0.314   | 0.9484                                   | 0.305   | 0.305   |
| rs12538145                       | 7    | SLC25A13                   | C/G     | C           | <i>0.0036</i>                             | <i>0.988</i> | <i>0.946</i> | 0.3958                              | 0.967   | 0.957   | 0.5059                       | 0.937   | 0.953   | 0.7627                                   | 0.959   | 0.956   |
| rs2307355                        | 7    | MCM7                       | A/G     | A           | <i>0.2060</i>                             | <i>0.083</i> | <i>0.054</i> | 0.3797                              | 0.031   | 0.041   | 0.6476                       | 0.047   | 0.057   | 0.3223                                   | 0.035   | 0.046   |
| rs11768465                       | 7    | FBX024                     | C/T     | C           | <i>0.0269</i>                             | <i>0.840</i> | <i>0.763</i> | 0.3915                              | 0.785   | 0.765   | <b>0.0184</b>                | 0.761*  | 0.863*  | 0.6561                                   | 0.779   | 0.790   |
| rs875659 <sup>b</sup>            | 7    | CUX1                       | C/T     | C           | <i>1.23E-04</i>                           | <i>0.524</i> | <i>0.355</i> | 0.4509                              | 0.445   | 0.483   | 0.9677                       | 0.469   | 0.471   | 0.4977                                   | 0.451   | 0.478   |
| rs3819479                        | 7    | RELN                       | A/T     | T           | <i>0.0023</i>                             | <i>0.821</i> | <i>0.703</i> | 0.1745                              | 0.746   | 0.782   | 0.9647                       | 0.795   | 0.793   | 0.2366                                   | 0.759   | 0.788   |
| rs6976167                        | 7    | LHFPL3                     | C/T     | T           | <i>0.3846</i>                             | <i>0.140</i> | <i>0.114</i> | 0.4676                              | 0.105   | 0.085   | 0.1805                       | 0.109   | 0.069   | 0.2009                                   | 0.106   | 0.082   |
| rs12666599                       | 7    | LHFPL3                     | C/T     | T           | <i>0.0030</i>                             | <i>0.901</i> | <i>0.804</i> | 0.9622                              | 0.846   | 0.847   | 0.4967                       | 0.862   | 0.836   | 0.6922                                   | 0.850   | 0.843   |
| rs4730037                        | 7    | LHFPL3                     | C/T     | C           | <i>0.0042</i>                             | <i>0.448</i> | <i>0.314</i> | 0.2501                              | 0.367   | 0.336   | 0.8526                       | 0.344   | 0.354   | 0.3516                                   | 0.362   | 0.340   |
| rs9690688                        | 7    | LAMB4                      | G/T     | T           | <i>0.0038</i>                             | <i>0.099</i> | <i>0.033</i> | 0.3183                              | 0.045   | 0.058   | 0.8242                       | 0.068   | 0.074   | 0.3409                                   | 0.051   | 0.063   |
| rs6951925                        | 7    | NT_007933.689 <sup>d</sup> | G/T     | G           | <i>0.0027</i>                             | <i>0.242</i> | <i>0.134</i> | 0.6671                              | 0.152   | 0.169   | 0.2490                       | 0.250   | 0.197   | 0.9084                                   | 0.175   | 0.173   |
| rs1464895                        | 7    | IMMP2L                     | A/G     | A           | <i>0.1754</i>                             | <i>0.202</i> | <i>0.154</i> | 0.4854                              | 0.161   | 0.145   | <b>0.0042</b>                | 0.120*  | 0.235*  | 0.3043                                   | 0.150   | 0.170   |
| rs10499993 <sup>b</sup>          | 7    | IMMP2L                     | A/G     | G           | <i>0.3274</i>                             | <i>0.806</i> | <i>0.768</i> | 0.0700                              | 0.791   | 0.743   | 0.8217                       | 0.755   | 0.766   | 0.1376                                   | 0.782   | 0.749   |



**Table S1. Results of family-based analysis of replication samples using UNPHASED (continued).**

| SNP                              | Chr. | Gene                        | Alleles | Risk Allele | IMGSAC-PRIMARY<br>(family-based analysis) |         |         | IMGSAC-R<br>(294 affected subjects) |         |         | ND<br>(96 affected subjects) |         |         | IMGSAC-R + ND<br>(390 affected subjects) |         |         |
|----------------------------------|------|-----------------------------|---------|-------------|-------------------------------------------|---------|---------|-------------------------------------|---------|---------|------------------------------|---------|---------|------------------------------------------|---------|---------|
|                                  |      |                             |         |             | P-value                                   | Ca-Freq | Co-Freq | P-value                             | Ca-Freq | Co-Freq | P-value                      | Ca-Freq | Co-Freq | P-value                                  | Ca-Freq | Co-Freq |
| rs2030781 <sup>b</sup>           | 7    | IMMP2L                      | C/T     | C           | 0.0759                                    | 0.282   | 0.209   | 0.0798                              | 0.261   | 0.215   | 0.1661                       | 0.184   | 0.243   | 0.3332                                   | 0.242   | 0.222   |
| rs12537269                       | 7    | IMMP2L                      | A/G     | A           | 0.0482                                    | 0.294   | 0.213   | <b>0.0485</b>                       | 0.262   | 0.210   | 0.7737                       | 0.255   | 0.243   | 0.0667                                   | 0.260   | 0.220   |
| rs1528039                        | 7    | IMMP2L                      | C/T     | C           | 0.1474                                    | 0.250   | 0.193   | 0.3420                              | 0.202   | 0.182   | 0.3065                       | 0.201   | 0.247   | 0.8061                                   | 0.202   | 0.199   |
| rs2217262                        | 7    | DOCK4                       | A/C     | A           | 0.0184                                    | 0.972   | 0.925   | <b>0.0272</b>                       | 0.955   | 0.924   | <b>0.0055</b>                | 0.979   | 0.916   | <b>9.21E-04</b>                          | 0.962   | 0.921   |
| rs989613                         | 7    | NT_007933.632 <sup>d</sup>  | A/G     | G           | 0.0152                                    | 0.832   | 0.740   | 0.2219                              | 0.838   | 0.863   | 0.2199                       | 0.739   | 0.795   | 0.0925                                   | 0.812   | 0.848   |
| rs7807053                        | 7    | KCND2                       | A/C     | A           | 0.0611                                    | 0.107   | 0.062   | 0.0677                              | 0.094   | 0.132   | 0.5692                       | 0.113   | 0.095   | 0.2002                                   | 0.099   | 0.122   |
| rs41620                          | 7    | 3' of TSPAN12               | A/G     | A           | 0.0012                                    | 0.790   | 0.661   | 0.7367                              | 0.778   | 0.773   | 0.4398                       | 0.714   | 0.747   | 0.9775                                   | 0.762   | 0.766   |
| rs2525720                        | 7    | ING3                        | A/G     | A           | 0.0011                                    | 0.849   | 0.729   | 0.3414                              | 0.838   | 0.818   | nd                           | nd      | nd      | nd                                       | nd      | nd      |
| rs538558                         | 7    | 3' of FEZF1                 | A/T     | A           | 0.1223                                    | 0.373   | 0.304   | 0.8246                              | 0.364   | 0.369   | 0.9714                       | 0.319   | 0.317   | 0.9373                                   | 0.353   | 0.352   |
| rs11978485                       | 7    | 3' of SLC13A1               | A/G     | G           | 0.0136                                    | 0.865   | 0.780   | 0.6299                              | 0.825   | 0.813   | 0.4272                       | 0.771   | 0.733   | 0.3158                                   | 0.812   | 0.791   |
| rs6962740                        | 7    | 5' of SMO                   | C/G     | G           | 0.2366                                    | 0.849   | 0.812   | 0.8941                              | 0.791   | 0.783   | 0.2092                       | 0.721   | 0.780   | 0.5698                                   | 0.772   | 0.783   |
| rs2030974                        | 7    | 5' of CPA2                  | C/T     | C           | 0.0150                                    | 0.401   | 0.294   | 0.0515                              | 0.279   | 0.333   | 0.9839                       | 0.258   | 0.259   | 0.0991                                   | 0.274   | 0.314   |
| rs2171493                        | 7    | 5' of CPA2                  | A/C     | C           | 0.0233                                    | 0.337   | 0.243   | <b>0.0230</b>                       | 0.242*  | 0.301*  | 0.8506                       | 0.216   | 0.224   | <b>0.0459</b>                            | 0.235*  | 0.282*  |
| rs10275276 (proxy for rs1863009) | 7    | AK054623                    | C/T     | T           | 0.2947                                    | 0.274   | 0.232   | 0.9594                              | 0.253   | 0.252   | 0.3956                       | 0.247   | 0.211   | 0.6972                                   | 0.251   | 0.243   |
| rs7787173                        | 7    | NT_007933.1017 <sup>d</sup> | A/T     | A           | 0.0020                                    | 0.913   | 0.818   | 0.3798                              | 0.885   | 0.867   | nd                           | nd      | nd      | nd                                       | nd      | nd      |
| rs4731863                        | 7    | PLXNA4                      | A/T     | T           | 1.30E-04                                  | 0.976   | 0.895   | 0.1591                              | 0.907   | 0.931   | 0.0987                       | 0.891   | 0.938   | <b>0.0391</b>                            | 0.903*  | 0.934*  |

<sup>a</sup> SNPs also tested in Mount Sinai sample (not significant)

<sup>b</sup> SNPs also tested in U. Washington sample (not significant)

<sup>c</sup> PhastCons - highly conserved region

<sup>d</sup> Transcript not annotated in human reference sequence build 36.1

**Table S2. CNVs detected by QuantiSNP analysis**

| Chr.    | Locus   | Start (Mb) | End (Mb) | Length (kb) | log BF | Copy number | Sample ID |                                            | Segregation <sup>a</sup>                          | Gene(s)                                                             | DGV (overlap) |                                |              |
|---------|---------|------------|----------|-------------|--------|-------------|-----------|--------------------------------------------|---------------------------------------------------|---------------------------------------------------------------------|---------------|--------------------------------|--------------|
| 2       | 1       | 154.645    | 154.798  | 152.4       | 29.5   | 3           | 133010002 | Mother                                     | Not transmitted to proband                        | <i>GALNT13</i>                                                      | Yes (14%)     |                                |              |
|         | 2       | 168.721    | 169.384  | 663.5       | 183.9  | 3           | C0953     | Control                                    | N/A                                               | <i>STK39, LASS6</i>                                                 | Yes (24%)     |                                |              |
|         | 3       | 179.106    | 179.381  | 275.1       | 13.8   | 3           | 150033002 | Mother                                     | Not transmitted to proband                        | <i>TTN</i>                                                          | Yes (72%)     |                                |              |
|         |         | 179.250    | 179.381  | 130.8       | 11.3   | 3           | 130540004 | Mother                                     | Not transmitted to proband                        | <i>TTN</i>                                                          | Yes (100%)    |                                |              |
|         | 4       | 190.853    | 190.944  | 91.0        | 20.6   | 3           | 150022001 | Father                                     | Not transmitted to proband                        | <i>HIBCH, INPP1</i>                                                 | No            |                                |              |
| 5       | 191.224 | 191.538    | 313.9    | 10.4        | 1      | 130079004   | Father    | Not transmitted to proband                 | <i>NAB1, GLS</i>                                  | Yes (2%)                                                            |               |                                |              |
| 7       | 1       | 100.749    | 100.917  | 167.7       | 48.0   | 3           | 140713301 | Proband                                    | Affected sib inherited duplication                | <i>EMID2</i> and <i>RABL5</i>                                       | Yes (100%)    |                                |              |
|         |         | 100.749    | 100.896  | 147.1       | 13.8   | 3           | 140713202 | Mother                                     |                                                   |                                                                     |               |                                |              |
|         |         | 100.749    | 100.917  | 167.7       | 45.3   | 3           | 134002005 | Proband                                    | Not determined                                    | <i>EMID2</i> and <i>RABL5</i>                                       |               |                                |              |
|         |         | 100.788    | 100.917  | 128.9       | 38.1   | 3           | 134002002 | Mother                                     |                                                   |                                                                     |               |                                |              |
|         |         | 100.749    | 100.915  | 166.4       | 22.8   | 3           | 150001004 | Proband                                    | Affected sib inherited duplication                | <i>EMID2</i> and <i>RABL5</i>                                       |               |                                |              |
|         |         | 100.749    | 100.917  | 167.7       | 30.9   | 3           | 150001002 | Mother                                     | Not transmitted to proband or two unaffected sibs | <i>EMID2</i>                                                        |               |                                |              |
|         |         | 100.788    | 100.917  | 128.9       | 50.4   | 3           | 131085007 | Father                                     |                                                   |                                                                     |               |                                |              |
|         |         | 100.788    | 100.915  | 127.6       | 12.7   | 3           | C2142     | Control                                    |                                                   |                                                                     |               | N/A                            | <i>EMID2</i> |
|         |         | 2          | 110.198  | 110.271     | 73.0   | 40.0        | 1         | 116325010                                  | Father                                            | Not transmitted to proband                                          |               | <i>IMMP2L (intronic)</i>       | No           |
|         |         | 3          | 110.639  | 111.454     | 815.6  | 119.3       | 3         | 133023001                                  | Father                                            | Not transmitted to other affected sib or unaffected sib (by QMPFSF) |               | <i>IMMP2L</i> and <i>DOCK4</i> | Yes (60%)    |
| 110.708 | 111.450 |            | 742.6    | 56.0        | 3      | 133023005   | Proband   |                                            |                                                   |                                                                     |               |                                |              |
| 4       | 115.640 | 115.791    | 150.9    | 10.5        | 1      | UKTS9020    | Control   | N/A                                        | <i>TES</i>                                        | Yes (23%)                                                           |               |                                |              |
| 5       | 124.276 | 125.280    | 1003.9   | 10.3        | 1      | C2048       | Control   | N/A                                        | <i>POT1</i>                                       | Yes (47%)                                                           |               |                                |              |
|         | 124.521 | 124.856    | 334.6    | 12.8        | 1      | 130518003   | Father    | Not transmitted to proband                 | <i>No RefSeq genes</i>                            | Yes (85%)                                                           |               |                                |              |
| 6       | 132.728 | 132.843    | 114.5    | 32.4        | 1      | 130519003   | Father    | Not transmitted to proband or affected sib | <i>EXOC4</i>                                      | No                                                                  |               |                                |              |
|         | 132.728 | 132.829    | 100.7    | 11.5        | 4      | C0906       | Control   |                                            |                                                   |                                                                     | N/A           |                                |              |
| 7       | 133.784 | 133.793    | 8.7      | 14.7        | 1      | 131117006   | Mother    | Not transmitted to proband                 | <i>AKR1B1</i>                                     | No                                                                  |               |                                |              |

<sup>a</sup> Unless otherwise stated, segregation was determined by haplotype analysis of published genotype data (Szatmari et al 2007)
